# Supplementary material for: Compensation of Disabled Organogeneses in Genetically Modified Pig Fetuses by Blastocyst Complementation
Source: PubMed Central journal article supplement — Stem Cell Reports. 2019 Dec 26;14(1):21–33. doi: 10.1016/j.stemcr.2019.11.008 (PMC6962638; doi:10.1016/j.stemcr.2019.11.008), 2019-12-26
Supplement: mmc2.pdf [file mmc2.pdf]

# Compensation of Disabled Organogeneses in Genetically Modified Pig Fetuses by Blastocyst Complementation

Hitomi Matsunari,<sup>1,6</sup> Masahito Watanabe,<sup>1,6</sup> Koki Hasegawa,<sup>2</sup> Ayuko Uchikura,<sup>2</sup> Kazuaki Nakano,<sup>2</sup> Kazuhiro Umeyama,<sup>1</sup> Hideki Masaki,<sup>5</sup> Sanae Hamanaka,<sup>5</sup> Tomoyuki Yamaguchi,<sup>5</sup> Masaki Nagaya,<sup>1</sup> Ryuichi Nishinakamura,<sup>3</sup> Hiromitsu Nakauchi,<sup>4,5</sup> and Hiroshi Nagashima<sup>1,2,\*</sup>

<sup>1</sup>Meiji University International Institute for Bio-Resource Research, 1-1-1 Higashimita, Tama-ku, Kawasaki, Kanagawa 214-8571, Japan

<sup>2</sup>Laboratory of Developmental Engineering, Department of Life Sciences, School of Agriculture, Meiji University, 1-1-1 Higashimita, Tama-ku, Kawasaki, Kanagawa 214-8571, Japan

<sup>3</sup>Department of Kidney Development, Institute of Molecular Embryology and Genetics, Kumamoto University, Kumamoto, Kumamoto 860-0811, Japan

<sup>4</sup>Institute for Stem Cell Biology and Regenerative Medicine, Department of Genetics, Stanford University School of Medicine, 265 Campus Drive, Stanford, CA 94305, USA

<sup>5</sup>Division of Stem Cell Therapy, Distinguished Professor Unit, Institute of Medical Science, University of Tokyo, 4-6-1 Shirokanedai, Minato-ku, Tokyo 108-8639, Japan

<sup>6</sup>Co-first author

\*Correspondence: [hnagas@meiji.ac.jp](mailto:hnagas@meiji.ac.jp)

<https://doi.org/10.1016/j.stemcr.2019.11.008>

## SUMMARY

We have previously established a concept of developing exogenic pancreas in a genetically modified pig fetus with an apancreatic trait, thereby proposing the possibility of *in vivo* generation of functional human organs in xenogenic large animals. In this study, we aimed to demonstrate a further proof-of-concept of the compensation for disabled organogeneses in pig, including pancreatogenesis, nephrogenesis, hepatogenesis, and vasculogenesis. These dysorganogenetic phenotypes could be efficiently induced via genome editing of the cloned pigs. Induced dysorganogenetic traits could also be compensated by allogenic blastocyst complementation, thereby proving the extended concept of organ regeneration from exogenous pluripotent cells in empty niches during various organogeneses. These results suggest that the feasibility of blastocyst complementation using genome-edited cloned embryos permits experimentation toward the *in vivo* organ generation in pigs from xenogenic pluripotent cells.

## INTRODUCTION

Generation of functional organs from pluripotent stem cells (PSCs) is one of the ultimate goals of regenerative medicine. In addition to the *in vitro* approaches, such as organoid culture and organ-fabrication (Jung et al., 2016; Liu et al., 2013; Lu et al., 2013; Taguchi et al., 2014; Takasato et al., 2015; Takasato and Little, 2016; Takebe et al., 2013, 2015; Yamanaka and Yokoo, 2015), an alternative *in vivo* strategy has been proposed. This strategy originally proposed by Kobayashi et al. (2010) uses an organogenesis-disabled animal and a blastocyst complementation technique. They generated an interspecies chimera by introducing rat induced pluripotent stem cells (iPSCs) into mouse embryos with a *Pdx1*<sup>-/-</sup> mutation that had caused a pancreatogenesis-disabled phenotype and succeeded in creating a mouse with the pancreas of a rat. These results were interpreted as follows—an intra-embryonic environment lacking endogenous pancreatic cell lineage allowed the exogenous rat iPSCs to colonize in an empty developmental niche to form a xenogeneic pancreas in the mouse body (Kobayashi et al., 2010; Rashid et al., 2014).

This approach is endorsed by the notion that *in vitro* generation of human organs with complex function and structure is extremely difficult (Rashid et al., 2014), and organ

development from PSCs in the natural physiological environment of a xenogeneic fetus would be better supported. Recent studies have been demonstrated compelling evidence for blastocyst complementation in rodents by generating organs, such as kidney, brain, vessels, and blood (Goto et al., 2019; Hamanaka et al., 2018; Kobayashi et al., 2010; Matsunari et al., 2013; Nagashima and Matsunari, 2016; Rashid et al., 2014; Usui et al., 2012; Wu et al., 2016; Yamaguchi et al., 2017).

To fulfill the ultimate aim of generating human organs in an animal body, the use of large animals is essential. We, therefore, established a blastocyst complementation system in pigs (Matsunari et al., 2013). At present, we have demonstrated the production of genetically modified pigs with a pancreatogenesis-disabled phenotype and proved that the missing organ could be restored by exogenous cells through allogenic blastocyst complementation (Matsunari et al., 2013). The concept of blastocyst complementation that chimerizes a cloned dysorganogenetic embryo with functionally normal pluripotent cells needs to be verified for applicability to multifarious organs in pigs to determine the potential value of the technology in the medical setting.

In our previous study (Matsunari et al., 2013), the apancreatic phenotype was induced in pigs by the overexpression of a transgene (mouse *Pdx1-Hes1*: hairy and

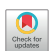

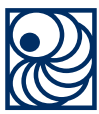

enhancer of split-1 gene driven by pancreatic and duodenal homeobox 1 gene promoter). In recent years, gene knockout (KO) by genome editing has significantly advanced its feasibility and practical applicability in mammals (Gupta and Musunuru, 2014; Tan et al., 2012). Thus, knocking out the master regulator gene of a specific organ has become a straightforward method for generating the dysorganogenetic phenotype (Goto et al., 2019; Hamanaka et al., 2018; Kobayashi et al., 2010; Usui et al., 2012; Vilarino et al., 2017). Direct genome editing for zygotes, however, has been reported to result in mosaic mutations (Vilarino et al., 2017), which hinder obtaining conclusive evidence for blastocyst complementation. We, therefore, used, in this study, a somatic cloning technique using nuclear donor cells carrying a defined loss-of-function mutation to produce host embryos with an organogenesis-disabled trait for blastocyst complementation.

We aimed at investigating the efficiency of genetic modification by genome editing in pigs to give rise to an organogenesis-disabled phenotype in various organs, including pancreas, kidney, liver, and blood vessels. We also verified the feasibility of blastocyst complementation for compensating the disabled organogeneses.

## RESULTS

### Apancreatic Phenotype Generated by *PDX1*-KO and Restoration of Normal Pancreatogenesis by Blastocyst Complementation

In our previous study (Matsunari et al., 2013), we demonstrated that an apancreatic phenotype in pigs could be achieved by overexpressing the mouse *Pdx1-Hes1* transgene. In this study, we knocked out porcine endogenous *PDX1* gene, based on previous reports demonstrating apancreatic phenotype caused by *Pdx1*<sup>-/-</sup> mutation in rodents (Jonsson et al., 1994; Kobayashi et al., 2010; Offield et al., 1996) and pigs (Kang et al., 2017).

Porcine fetal fibroblast cells (male) carrying TALEN-induced biallelic mutations in exon 1 of *PDX1* were used for somatic cell nuclear transfer (SCNT) (Figure S1A). Two types of cloned embryos were generated from two lines of nuclear donor cells with different mutation types (Figure S1B), and these cloned embryos were transferred together to a recipient gilt (Figure S1C). Analysis of four cloned fetuses recovered at mid-gestation (day 55) revealed that both the *PDX1*-KO mutations gave rise to apancreatic phenotypes (Figures 1A and S1C).

Primary cultured fibroblasts were established from the *PDX1*-KO apancreatic fetuses (male) and used for generating cloned embryos as the host embryos for blastocyst complementation. The host *PDX1*-KO embryos at the morula stage were injected, as reported previously (Matsu-

nari et al., 2013), with donor blastomeres derived from female cloned embryos expressing the fluorescent proteins, Kusabira-Orange (huKO) (Matsunari et al., 2008) or Plum (Watanabe et al., 2015). Transfer of 325 complemented embryos at the blastocyst stage to the uterus of four recipients resulted in three pregnancies, which allowed us to analyze ten full-term fetuses comprising four chimeric and six non-chimeric animals (Table S1). Chimerism was proven by phenotypic features (phenotypically male individuals expressing huKO or Plum) (Matsunari et al., 2018) or genotyping (Figure 1B). Two of the chimeric fetuses showed normally developed pancreata. The restored pancreata entirely expressed huKO fluorescence (Figures 1B and 1C), indicating that they were derived from exogenous cells. The restored pancreatic tissue demonstrated normal histological features, including endocrine and exocrine cells.

However, two of the chimeric fetuses possessed less-developed pancreata (Figures 1B and 1C). The proportion of the exogenous cells in these chimeric fetuses was lower (Figure 1B), suggesting that the restoration of the *PDX1*-KO apancreatic trait required chimerism with exogenous *PDX1*<sup>+/+</sup> cells in high density in the pancreatogenic progenitor tissue.

### Vasculogenesis-Disabled Phenotype Generated by Kinase Insert Domain Receptor-KO and Restoration of Normal Vessels by Blastocyst Complementation

Previous studies (Kobayashi et al., 2010; Usui et al., 2012; Yamaguchi et al., 2017) have revealed that blood vessels had been developed from both donors and host animal-derived cells in the restored organ generated by blastocyst complementation in apancreatic and anephrogenic animals. For clinical transplantation of an organ generated in a host animal by means of interspecies blastocyst complementation, it is necessary to replace the vasculature with exogenous human cells so that the number of xenogenic component cells derived from the host animal can be minimized.

Vasculogenesis can be disrupted by the deficiency of the *Flk-1* gene in rodents (Shalaby et al., 1995). Thus, establishing a vasculogenesis-disabled trait in the host animal and restoring the trait by exogenous cells may be a strategy to overcome composite vasculogenesis of the host- and donor-derived cells (Hamanaka et al., 2018). In this study, we, therefore, examined whether deficiency of the *FLK1* ortholog or kinase insert domain receptor (*KDR*) in pigs can cause the vasculogenesis-disabled phenotype as seen in rodents (Sakurai et al., 2005; Shalaby et al., 1995) and whether the trait can be restored by blastocyst complementation.

Additional *KDR* deficiency was introduced into the *PDX1*-KO fetal fibroblast cells (#45) using TALEN targeting the exon 1 of the gene (Figures S2A and S2B). The

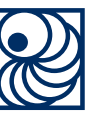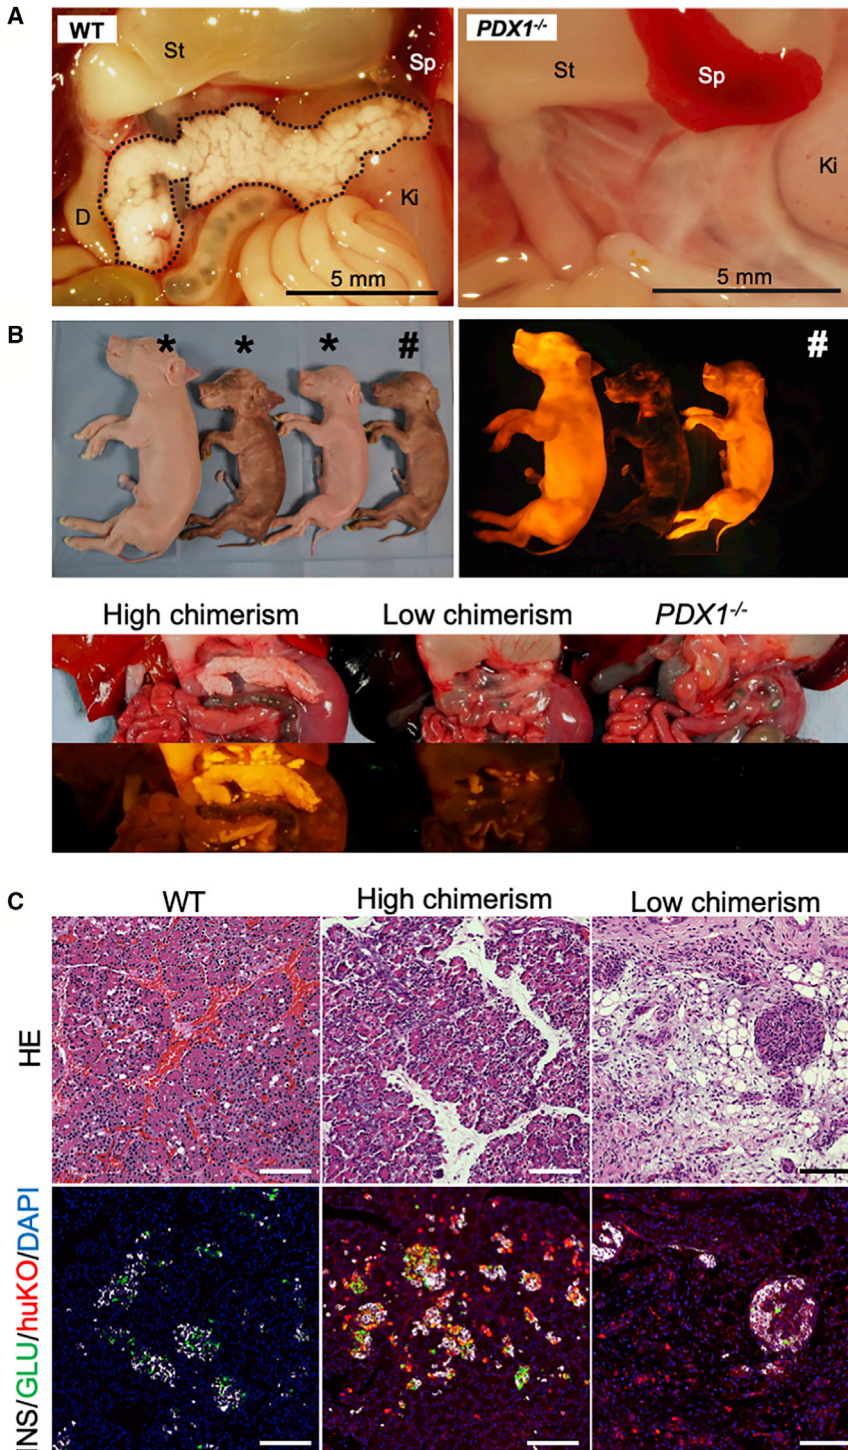

**Figure 1. Apancretic Phenotype of the  $PDX1^{-/-}$  Fetus and Restoration of Pancreatogenesis by Blastocyst Complementation**

(A) Apancretic phenotype of a  $PDX1^{-/-}$  cloned fetus at mid-gestation (day 55; WT, day 66).

(B) Chimeric full-term fetuses (three left animals in upper panels) and restored pancreata (lower panels). Fetuses exhibiting huKO fluorescence and male phenotype were determined as chimeras. Chimeric fetuses (\*) indicating higher level of systemic chimerism showed well-restored pancreata (leftmost in lower panels), while development of pancreatic tissue was poor in a fetus with lower chimerism (center in lower panels). The rightmost animal in upper panels (#) presents a  $PDX1$ -KO fetus showing typical features of the apancretic phenotype (lower panels).

(C) Histological features of the pancreatic tissue generated by blastocyst complementation. Upper panels: H&E-stained sections. Lower panels: sections immunostained for insulin (white), glucagon (green), and huKO (red). Restored pancreatic tissue of the fetus (center) with higher chimerism entirely expressed huKO fluorescence. Scale bars, 100  $\mu\text{m}$ .

$PDX1/KDR$  dual KO cells (male) were used for SCNT to produce cloned fetuses (Figure S2C). Fetuses at the somite stage (days 15–21) showed distinctly retarded development lacking vasculogenesis and blood flow at all embryonic stages observed (Figures 2A and 3A).

Blastocyst complementation was performed using the  $PDX1/KDR$ -KO cloned morulae as the host embryos and *in-vivo*-derived morulae expressing huKO as the blastomere donors. Transfer of 38 complemented blastocysts to a recipient gilt resulted in 27 fetuses (day 21), including



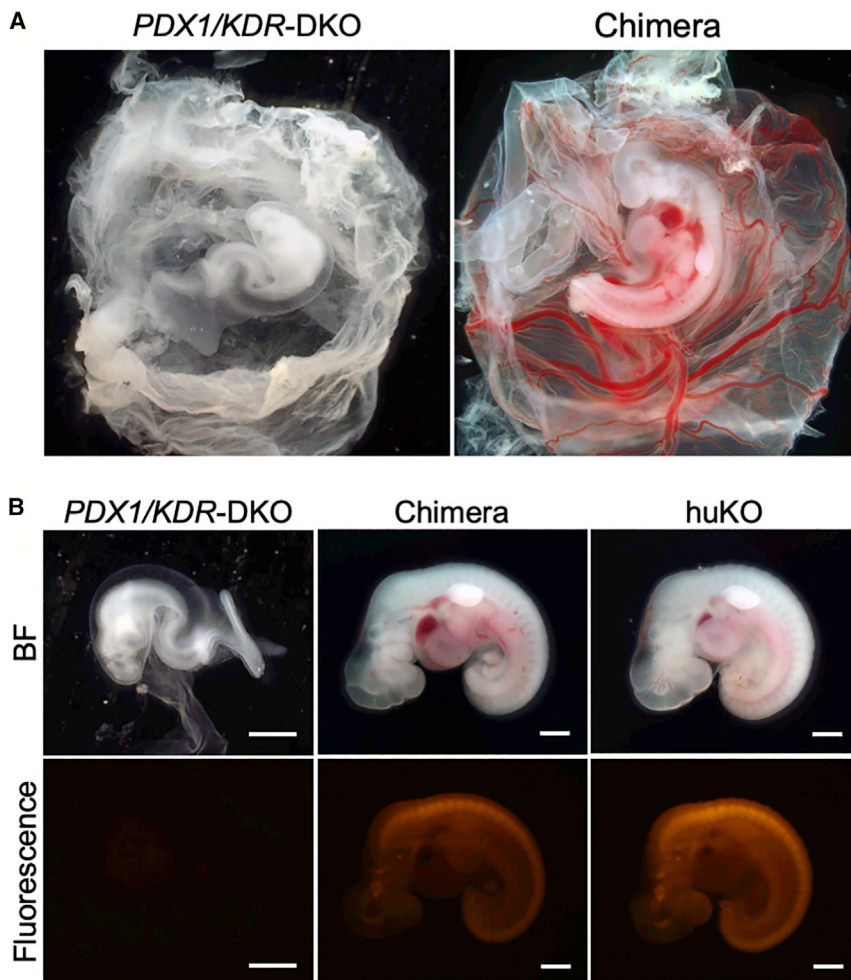

**Figure 2. Vasculogenesis-Disabled Phenotype of  $KDR^{-/-}$  Fetus and Its Compensation by Blastocyst Complementation**

(A) A  $PDX1/KDR$  dual KO (DKO) fetus with vasculogenesis-disabled phenotype (left) and a chimeric fetus with normalized trait (right) obtained after blastocyst complementation.

(B) Left: a  $PDX1/KDR$ -KO fetus showing retarded development without blood flow. Center: the appearance of a chimeric fetus showing systemic chimerism with dense distribution of the exogenous huKO-expressing cells. Right: morphology and fluorescence intensity of a normal fetus derived from the huKO transgenic cell. Scale bars, 1 mm.

See also [Figure S2](#).

9 chimeric and 18 non-chimeric fetuses ([Figure 2B](#); [Table S1](#)). Among the nine chimeric fetuses, five showed normal development, including vasculogenesis and blood flow similar to the normal cloned fetuses ([Figures 2](#) and [3A](#)). Four other chimeric fetuses exhibited severe retardation of development, which was typically observed in the  $PDX1/KDR$ -KO fetuses. Vasculogenesis was scarce in these chimeras, indicating that contribution of normal exogenous cells was limited in their embryo/fetal development.

Then, we examined the full-term development of the chimeric fetuses generated by complementation of the  $PDX1/KDR$ -KO embryos. The  $PDX1/KDR$ -KO host embryos were complemented by blastomeres of *in-vivo*-derived or IVF (*in vitro* fertilization)-derived morulae expressing huKO. Transfer of 92 complemented blastocysts to two recipients (one miscarried) gave rise to four full-term fetuses (day 106), including a chimera ([Figure 3B](#)). This chimeric fetus showed well-developed pancreas, including islets identified by endocrine markers

([Figure 3B](#)). Immunohistochemical analysis revealed that endothelial tissue and hematopoietic cells had derived from the donor cells ([Figures 3C](#) and [3D](#)). These results demonstrated that the dual organogenesis-disabled phenotype could be simultaneously rescued by blastocyst complementation.

#### **Anephrogenic Phenotype Generated by Spalt-like Transcription Factor 1-KO and Restoration of Normal Nephrogenesis by Blastocyst Complementation**

Homozygous KO of spalt-like transcription factor 1 (*Sall1*) in rodents was reported in a previous study to induce a nephrogenesis-disabled phenotype ([Goto et al., 2019](#); [Usui et al., 2012](#)). In this study, we investigated whether *SALL1*-KO in pigs also results in the anephrogenic phenotype and whether blastocyst complementation is effective in restoring the deficient trait.

Two types of porcine fetal fibroblasts harboring biallelic KO mutations in exon 3 of the *SALL1* gene were established



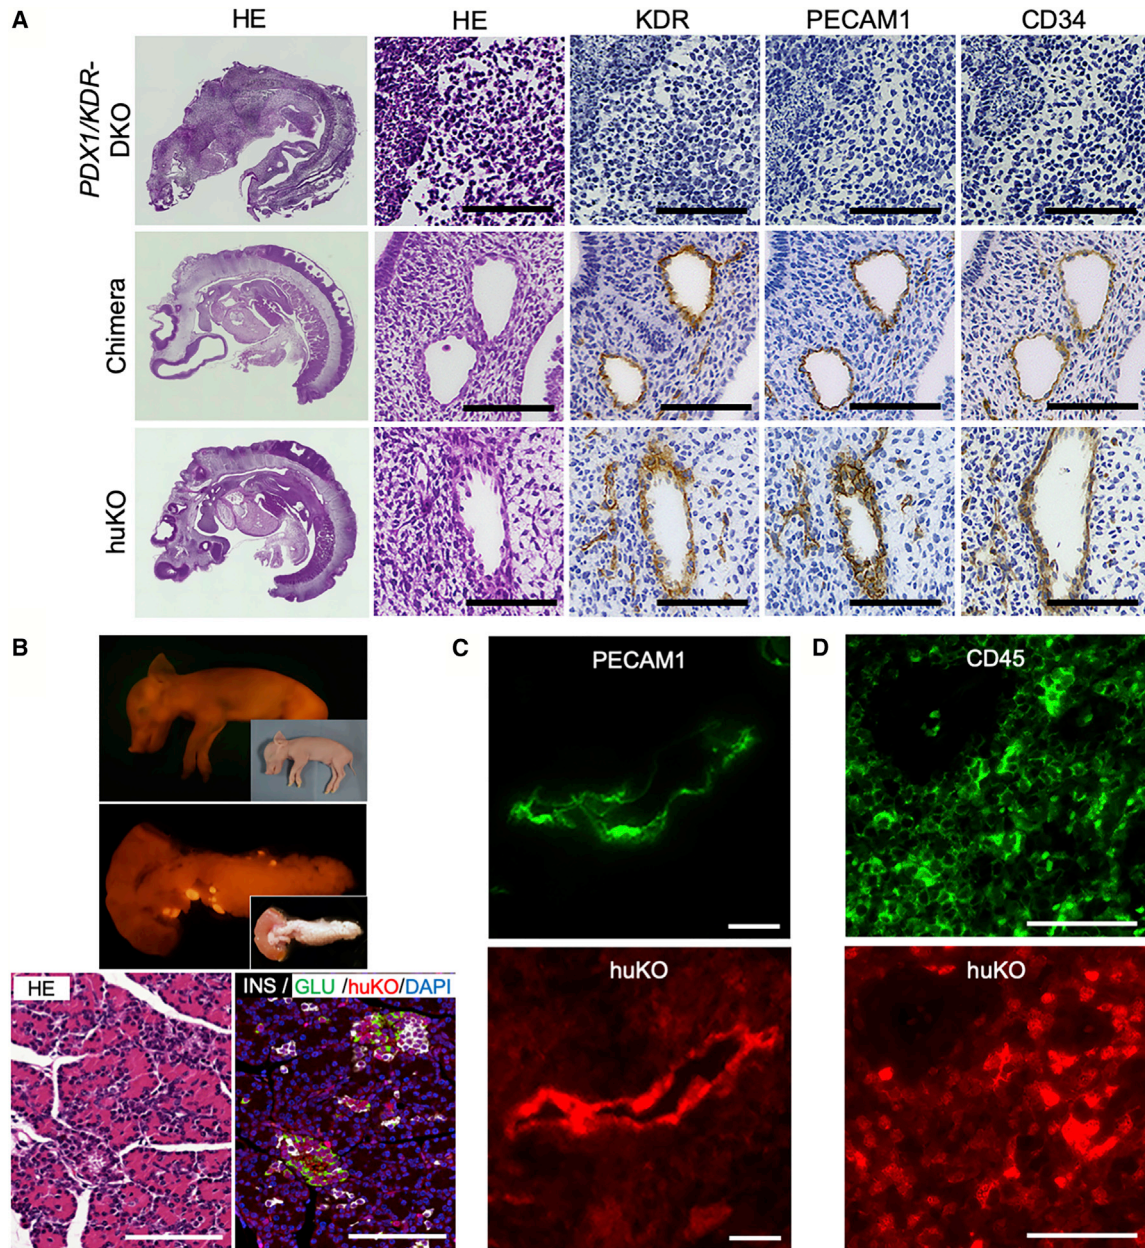

### Figure 3. Morphological and Histological Features of the *PDX1/KDR* Dual KO Cloned Fetuses and Its Compensation by Blastocyst Complementation

(A) Immunohistochemical analysis of *PDX1/KDR* dual KO fetuses and chimeric fetuses with compensated vasculogenesis by blastocyst complementation. Scale bars, 50  $\mu$ m. Left panels show H&E-stained sagittal section of day 21 fetuses. Top, a *PDX1/KDR* dual KO (DKO); middle, a chimera obtained by blastocyst complementation; bottom, a non-chimeric fetus derived from the huKO-expressing donor blastomeres. Signals of KDR, PECAM1, and CD34 can be seen (DAB stained) on the vascular endothelial cells of the chimera and donor cell (huKO) derived fetuses. On the other hand, neither vascular structure nor endothelial markers were observed in the tissue of the *PDX1/KDR* dual KO fetus.

(B) Upper panels: a full-term fetus proven to be chimeric by its phenotypic sex (male) accompanying huKO expression and its restored pancreas entirely expressed huKO fluorescence, indicating that it was generated from the exogenous cells as a result of complementation. Insets show bright-field pictures. Lower panels: the restored pancreatic tissue included well-developed islets stained with  $\alpha$  and  $\beta$  cell markers. Scale bars, 100  $\mu$ m.

(legend continued on next page)

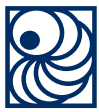

using genome editing by ZFN (Figures S3A and S3B). Using these cells for SCNT, we obtained five cloned fetuses at day 43 to 66 (Figure S3C). Figure 4A shows a typical *SALL1*-KO fetus exhibiting impaired nephrogenesis (day 43) accompanying normally developed ureters and urinary bladder. The size of the vestigial kidney tissue varied among the fetuses with the same mutation type (Figure S4A). Histological development of the vestigial *SALL1*<sup>-/-</sup> kidney was severely impaired with structural variations (Figure 4B). Renal tissues of the *SALL1*<sup>-/-</sup> fetuses mainly comprised of interstitial tissues lacking organized structures. Immunohistochemical analysis detected no SALL1 expression in these tissues (Figure 4B). On the other hand, ureters and bladders of the *SALL1*<sup>-/-</sup> fetuses exhibited no morphological and histological abnormalities. The most developed case we studied was the anephrogenic phenotype in a fetus at day 66. This fetus, however, appeared to be in the process of being aborted, suggesting lethality of the *SALL1*<sup>-/-</sup> mutation after the mid-gestation stage.

We established primary cultured fibroblasts from the cloned mutant fetuses with anephrogenic phenotype and used them as nuclear donors to produce host embryos for blastocyst complementation. The host embryos at the morula stage were complemented with blastomeres of cloned embryos expressing huKO. Transfer of 291 complemented blastocysts to four recipients (three impregnated) resulted in two chimeric and five non-chimeric fetuses (Table S1). Both chimeric fetuses retained impaired kidney development similar to the cloned *SALL1*-KO fetuses (Figure S4B). Distribution of huKO-expressing cells in the hypoplastic kidney tissue was limited (Figures S4B and S4C), indicating that contribution of exogenous cells in the development of these chimeric fetuses was not enough, hence resulting in the incomplete restoration of nephrogenesis of the *SALL1*-KO embryos. A limited number of the huKO-positive cells were seen in the ureter as well (Figure S4B).

In a reattempt at blastocyst complementation of the *SALL1*-KO cloned embryos, we used donor blastomeres prepared from *in-vivo*-derived or IVF-derived embryos, instead of the cloned embryos (Table S1). Transfer of 97 complemented blastocysts to two recipients (all impregnated) gave rise to 12 fetuses (Table S1), including a chimeric fetus (day 43) that exhibited normally developed kidneys (Figure 4C). The restored kidney tissue was histologically normal and entirely positive for huKO expression, confirming the role of exogenous cells in nephrogenesis (Figure 4D).

### Ahepatogenic Phenotype Generated by Hematopoietically Expressed Homeobox-KO and Restoration of Normal Hepatogenesis by Blastocyst Complementation

Hex deficiency in rodents is known to cause a hepatogenesis-disabled phenotype (Barbera et al., 2000). The aim of the following experiment was to investigate whether hematopoietically expressed homeobox (*HHEX*)-KO in pig also results in an ahepatogenic phenotype and whether blastocyst complementation is effective in restoring the deficient trait. Porcine fetal fibroblasts (PFFs) carrying biallelic KO mutations in exon 1 of the *HHEX* gene were established by TALEN (Figures S5A and S5B). Using these cells as nuclear donors for SCNT, cloned fetuses (day 22) were obtained, which exhibited severe developmental retardation, including liver dysplasia (Figures 5A, 5B, and S5C). Varying morphological abnormalities were significant in the anterior portion of the mutant fetuses as previously described for the *Hex*-KO mouse (Barbera et al., 2000).

*HHEX*-KO cloned embryos with ahepatogenic trait were used as the host embryos for blastocyst complementation. Host embryos at the morula stage were complemented using blastomeres from the *in-vivo*-derived morulae. As a result of transferring 37 complemented blastocysts to a recipient gilt, 15 fetuses (day 23), including 4 chimeric and 11 non-chimeric ones were produced (Table S1). Among the four chimeric fetuses, one exhibited organogenesis, including a normal liver (Figures 5A and 5B). Anatomical features of the restored liver were similar to an age-matched wild-type (WT) fetus. The other three chimeric fetuses showed severe developmental retardation as seen in the *HHEX*-KO fetuses, indicating limited contribution of the exogenous cells to embryogenesis thereby failure in restoring dysplastic hepatogenesis.

We then confirmed the full-term development of the fetuses with complemented hepatogenesis. We produced three chimeric fetuses after the transfer of 95 complemented blastocysts (Figures 5C; Table S1). The chimeric fetuses obtained were all alive at the time of the cesarean section and development of the liver was normal in all the animals (Figures 5D and 5E).

## DISCUSSION

To overcome organ shortage in organ transplantation therapy, we have advocated a concept of generating human

(C and D) (C) PECAM1-positive (green) endothelial tissue of a splenic blood vessel in the chimeric fetus exhibiting the donor-cell-derived huKO signal (red). (D) Spleen tissue of the chimeric fetus exhibiting double-positive signals of hematopoietic cell marker (CD45, green) and the donor-cell-derived huKO (red). (C and D) A pair of mirror-image sections were stained due to difficulty of double immunohistochemical staining (lower panels, flipped picture). Scale bars, 10  $\mu$ m (C) and 50  $\mu$ m (D).



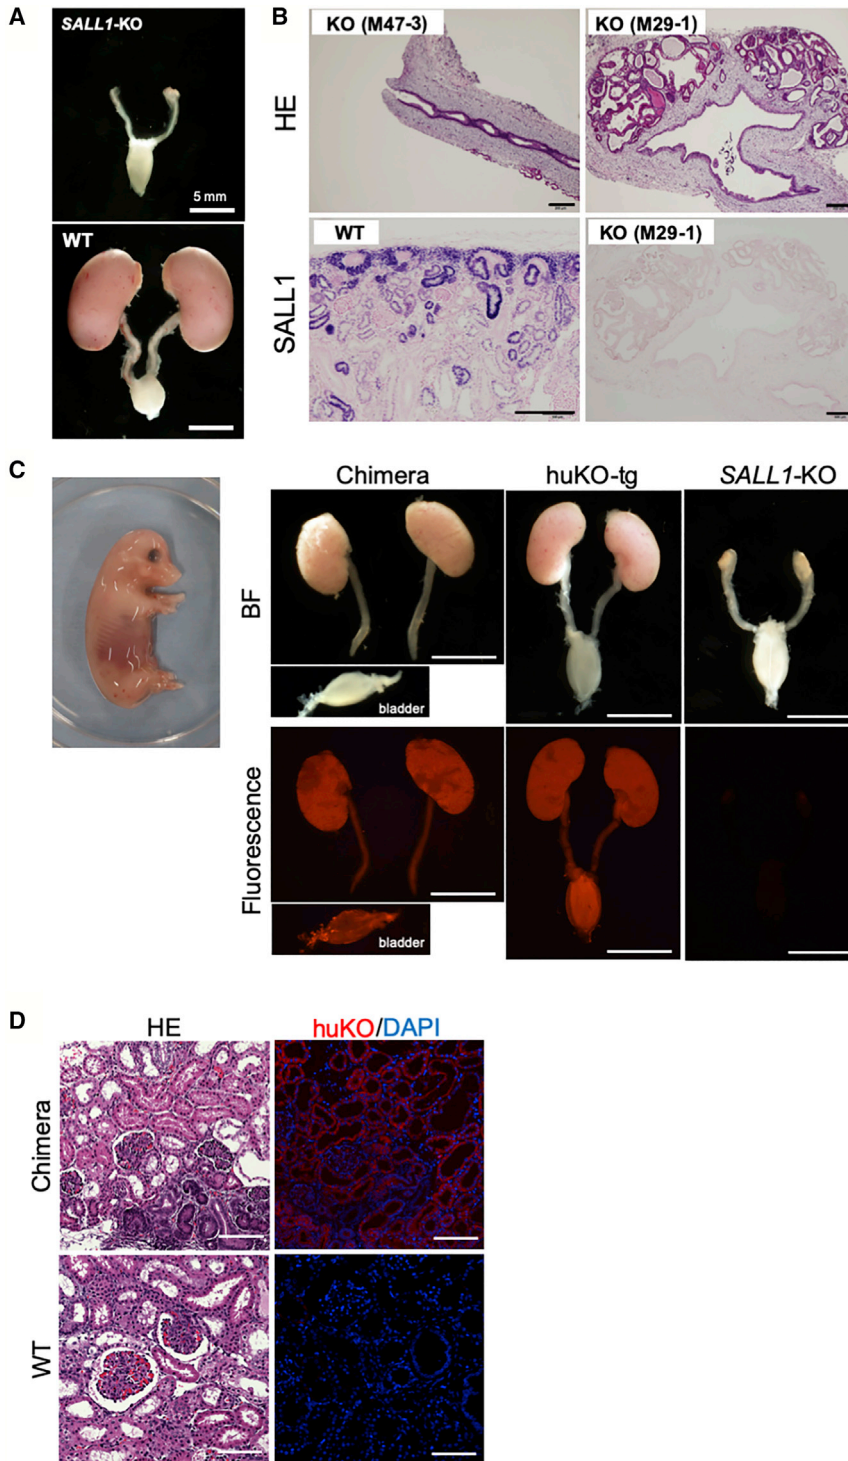

**Figure 4. Anephrogenic Phenotype of *SALL1*<sup>-/-</sup> Fetus and Its Compensation by Blastocyst Complementation**

(A) Anephrogenic phenotype of a *SALL1*<sup>-/-</sup> cloned fetus at mid-gestation (day 43). WT, kidney of age-matched control.

(B) Histological features of the vestigial kidney tissues. Upper panels indicate phenotypic variation in *SALL1*<sup>-/-</sup> fetuses. Immunostaining of the *SALL1*<sup>-/-</sup> vestigial kidney (lower right) detected no *SALL1* expression. Lower left: *SALL1*-positive WT tissue. Scale bars, 200  $\mu$ m.

(C) Normally developed kidneys of a chimeric fetus (day 43, left) obtained by blastocyst complementation. Note that the bladder was torn off from the ureter at the time of excising. huKO-tg, normally formed kidneys of a control fetus expressing huKO fluorescence. *SALL1*-KO, deficient renal development of a *SALL1*<sup>-/-</sup> fetus. Scale bars, 5 mm.

(D) Histological features of the kidney tissues (upper panels) from a chimeric fetus produced by blastocyst complementation. Fluorescence expression shown in the upper right panel indicates that renal development in the chimeric fetus is entirely compensated by exogenous cells by blastocyst complementation. Lower panels: renal tissues of a control WT fetus. Scale bars, 100  $\mu$ m.

See also Figure S4.

organs from PSCs by organogenesis in xenogenic animals. This concept consists of two fundamental technologies, i.e., induction of an empty developmental niche in the organogenesis of pig fetus and its compensation by exogenous iPSCs through blastocyst complementation. In this

study, we proved that disruption of a gene playing a pivotal role in organogenesis could give rise to an organogenesis-disabled trait in pigs not only for the pancreas, but also for the kidney, liver, and blood vessels. We also demonstrated the applicability of the blastocyst complementation



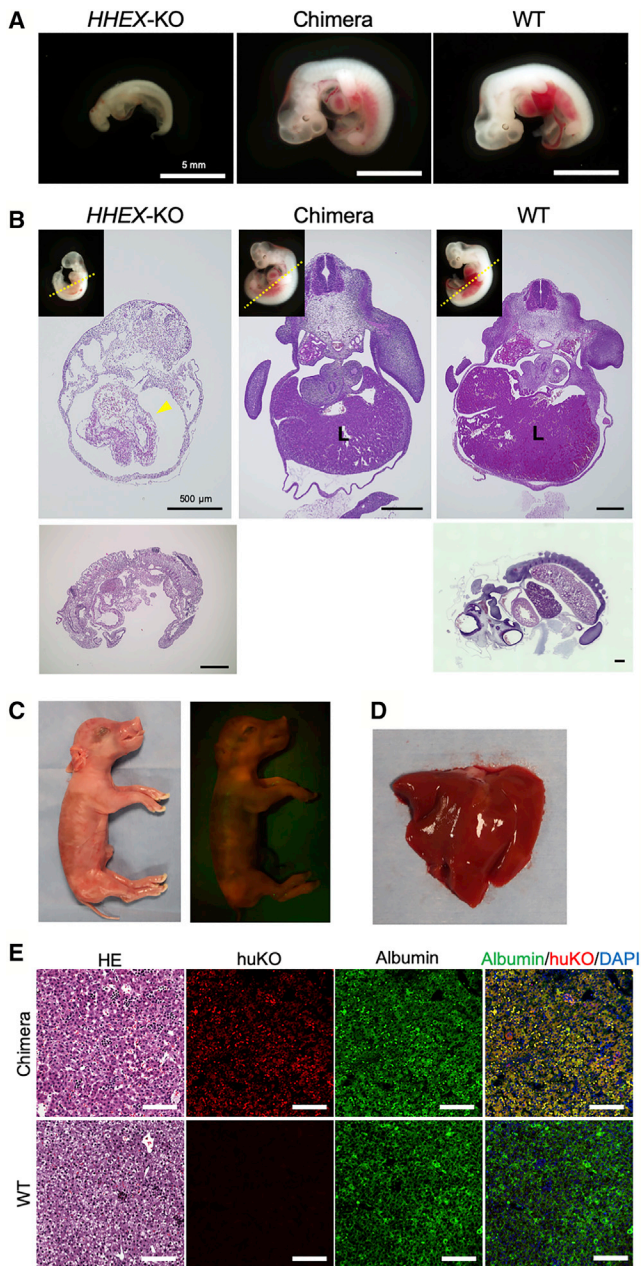

**Figure 5. Ahepatogenic Phenotype of *HHEX*<sup>-/-</sup> Fetus and Its Compensation by Blastocyst Complementation**

(A) An *HHEX*<sup>-/-</sup> fetus with a hepatogenesis-disabled phenotype (left) and a fetus with normalized trait obtained after blastocyst complementation (middle). Scale bars, 5 mm.

(B) Transverse section of a *HHEX*<sup>-/-</sup> fetus (left) with a nearly empty liver capsule-like structure (arrowhead), indicating failure of liver development. A chimeric fetus obtained by blastocyst complementation (center) exhibited normally developed liver as seen in a WT fetus (right). Inset pictures of fetuses indicate directions of the transverse sections (dotted line). Sagittal sections of the *HHEX*<sup>-/-</sup> (left) and WT (right) fetuses. Scale bars, 500  $\mu$ m.

technique in an allogenic setting for compensating the dysorganogenetic phenotypes of the pigs.

We revealed, in this study, that knocking out porcine *PDX1* gave rise to an apancreatic phenotype as has been shown in rodents (Jonsson et al., 1994; Kobayashi et al., 2010; Offield et al., 1996). In our previous study (Matsunari et al., 2013), vestigial pancreatic tissue remained in the phenotype induced by *Pdx1-Hes1* overexpression. The results of our study, as well as that of Kang et al. (2017), showed that the *PDX1*-KO in pig gave rise to a complete apancreatic phenotype while permitting the mutant fetus to develop to full term. To our knowledge, this is the first report demonstrating successful blastocyst complementation in pigs with *PDX1*-KO-induced complete pancreatogenesis-disabled phenotype (Kang et al., 2017).

Blastocyst complementation of the *PDX1*-KO trait, however, could occasionally result in incomplete restoration of the missing pancreata even in chimeric piglets exhibiting overt coat color chimerism. Pancreatic progenitor cells expressing *PDX1* appear in the foregut of the somite stage fetuses (Habener et al., 2005). Dense contribution of exogenous cells in the pancreatic precursor region of the chimeric fetus was probably crucial in determining the fate of pancreatogenesis.

To accomplish successful clinical transplantation of a pig-derived human organ, the presence of porcine tissues, such as blood vessels need to be avoided to prevent xenorejections. We demonstrated for the first time in pigs that generation of host-derived blood vessels could also be replaced by exogenous cells in the *KDR*-KO host embryos for blastocyst complementation. In this study, we additionally knocked out the *KDR* gene of the *PDX1*-KO fetal fibroblast cells. This appears to be a feasible option to add *KDR*-KO to a preexisting cell line carrying other dysorganogenetic mutations.

*Flk-1* null mice have been reported to die between embryonic day E8.5 and E9.5 without any organized blood vessels or yolk sac blood islands (Sakurai et al., 2005; Shalaby et al., 1995). *KDR*-KO in pigs was also found to be lethal to the embryo at the somite stage around E15 to E17, which corresponds to E8.5/E9.5 in mice (Noden and de Lahunta, 1985). Thus *KDR*-KO in pigs appeared to become lethal at nearly the same embryonic stage as in the *Flk-1*<sup>-/-</sup> mice.

Fetuses with restored vasculogenesis generated by complementation of the *PDX1*/*KDR*-KO embryos were

(C) A chimeric (*HHEX*<sup>-/-</sup> ↔ *huKO*) full-term fetus with normal hepatogenesis obtained by blastocyst complementation, showing fluorescence derived from the donor cells.

(D) Morphologically normal liver developed in the chimeric fetus. (E) Histological features of the liver developed from the exogenous cells. Scale bars, 100  $\mu$ m.



chimeric with a systemically higher contribution of exogenous cells. *KDR* expression is pivotal for the development of multiple tissues that are distributed throughout the whole body, including vascular endothelia, smooth muscles, and hematopoietic cells (Hamanaka et al., 2018; Sakurai et al., 2005; Shalaby et al., 1995). Therefore, dense distribution of exogenous cells throughout the body tissue of the chimeric fetuses may be hardly avoidable when the empty niche of *KDR* deficiency is to be compensated.

Systemic chimerism is also an emerging challenge in compensation of a gene deficiency, such as *HHEX*-KO, which is involved in the dysorganogenesis of multiple organs. *HHEX* plays a pivotal role not only in hepatogenesis, but also in the generation of the thyroid and forebrain (Barbera et al., 2000; Bort et al., 2006; Keng et al., 2000). In the conception of interspecies blastocyst complementation between pigs and humans, the incidence of disordered chimerism involving exogenous human cells needs to be avoided. Developing measures to restrict chimerism (Kobayashi et al., 2015) in the target organ/tissue will be increasingly important.

Deletion of *Sall1* in mice has been reported to cause depletion of nephron progenitors in developing kidney (Nishinakamura et al., 2001), thereby resulting in renal agenesis or hypoplasia. Our results demonstrated that *SALL1*<sup>-/-</sup> in pigs also gave rise to the anephrogenic phenotype. We also demonstrated for the first time in pigs that the anephrogenic phenotype of *SALL1*-KO could be compensated by allogenic blastocyst complementation, as shown in the previous rodent study (Usui et al., 2012).

Our data suggested that the degree of chimerism appeared to be critical for successful compensation of the anephrogenic phenotype. In the chimeric fetuses in which compensation of the *SALL1*<sup>-/-</sup> anephrogenic phenotype was incomplete, distribution of the donor blastomere-derived cells appeared less in the nephrogenic tissue. Fetal kidneys develop through mutual inductive interaction between the metanephric mesenchyme and the ureteric bud (Nishinakamura et al., 2001). Minor populations of normal cells in the nephrogenic progenitor tissues might have failed to ensure nephrogenesis in the *SALL1*<sup>-/-</sup> ↔ WT chimeras.

During blastocyst complementation for the anephrogenic phenotype in *Sall1*<sup>-/-</sup> mice, some of the nephric tissues, such as collecting duct and microvascular endothelium, were not entirely replaced by exogenic cells (Usui et al., 2012). These results would imply coexistence of the host-derived cells in the kidney tissue that is generated by interspecies blastocyst complementation. Although residual cells/tissues in the *SALL1*<sup>-/-</sup> porcine kidney are yet to be examined, additional genetic modifications to the *SALL1*<sup>-/-</sup> trait would enable high-level elimination of the pig-derived cells (Yamanaka et al., 2017).

Autopsy of four recipient females that conceived the *SALL1*<sup>-/-</sup> fetuses yielded no anephrogenic fetus that had grown beyond the mid-gestation stage (Figure S3). We conducted a separate study in which the *SALL1*<sup>+/-</sup> males and females produced by TALEN-mediated genome editing of zygotes were mated with each other. We obtained compelling data indicating lethality of the *SALL1*<sup>-/-</sup> fetuses around the mid-gestation stage (Watanabe et al., 2019). Therefore, it is unlikely that the lethality of the *SALL1*<sup>-/-</sup> fetuses obtained in this study is ascribed to the abnormality of the cloned fetuses. Although involvement of off-target mutations in the *SALL1*<sup>-/-</sup> fetuses cannot be ruled out, possible influence of *SALL1*-KO in multiple organs/tissues, including brain, limb buds, and heart (Kohlhase et al., 1996; Usui et al., 2012), is more likely the cause of fetal lethality in pigs. Usui et al. (2012) ascribed neonatal lethality of the *Sall1*-KO mice to a defect in the nervous system causing abnormal suckling function. The reasons for the lethality of the *SALL1*<sup>-/-</sup> pig fetuses are yet to be investigated.

In our previous study, we obtained a proof-of-concept (POC) for blastocyst complementation that compensates for the anepancreatic phenotype of the porcine *Pdx1-Hes1* transgenic embryos. In this study, we demonstrated that the POC could be extended to a wider range of dysorganogenetic phenotypes induced by an alternative genetic modification approach, i.e., genome editing. Although factors hindering interspecies chimerism between humans and pigs is yet to be clarified, blastocyst complementation has been proposed as a means of compensating the empty developmental niche of organogenesis by exogenous-xenogenic pluripotent cells. Strategies that allow the organogenic region of the target organ in a pig fetus to be highly chimeric with the xenogenic cells will be a crucial part of future research. Attempts using chimera-competent porcine embryonic stem cells (Gao et al., 2019) would secure a bridgehead into human-pig blastocyst complementation. At the same time, developing a strategy for cell fate control is also crucial to ensure compensation of the empty developmental niche, while avoiding unwanted systemic chimerism.

## EXPERIMENTAL PROCEDURES

### Animal Care and Chemicals

All animal experiments in this study were approved by the Institutional Animal Care and Use Committee of Meiji University (IACUC07-0006, 11-0016, 12-0008, 16-0006, 17-0005). All chemicals were purchased from Sigma-Aldrich (St. Louis, MO) unless otherwise indicated.

### Design and Preparation of Genome Editing Tools

Custom TALEN plasmids targeted to porcine *PDX1*, *KDR*, and *HHEX* genes, and ZFN plasmids targeted to porcine *SALL1* gene,



were obtained from ToolGen (Seoul, South Korea) and Sigma-Aldrich, respectively. The design and validation of these TALENs and ZFNs were performed by the manufacturers. For the production of mRNAs encoding TALENs and ZFNs, each of the linearized plasmids were used as templates for *in vitro* transcription. The capped and poly(A)-tailed TALEN and ZFN mRNAs were synthesized using a mMESAGE mMACHINE T7 Ultra Kit (Thermo Fisher Scientific, Waltham, MA) according to the manufacturer's instructions. The TALEN- and ZFN-encoding mRNAs were purified using a MEGAclear Kit (Thermo Fisher Scientific) and suspended in RNase-free water. These genome-editing molecules were stored at  $-80^{\circ}\text{C}$  until use.

### Establishment of Gene-KO Cells and Culture Conditions

A primary culture of male PFF cells that was used to establish gene-KO cells was cultured in Minimum Essential Media  $\alpha$  (Thermo Fisher Scientific) supplemented with 15% fetal bovine serum (FBS) and 1% antibiotic-antimycotic solution (Thermo Fisher Scientific) in type-I collagen-coated dishes or plates (AGC Techno Glass, Shizuoka, Japan), under a humidified atmosphere containing 5%  $\text{CO}_2$  at  $37^{\circ}\text{C}$ . For electroporation, PFF cells were cultured to 70%–90% confluence, washed twice with Dulbecco's PBS (D-PBS(–)) and detached with 0.05% trypsin-EDTA. These cells ( $5 \times 10^5$ ) were suspended in 50  $\mu\text{L}$  buffer R (included in the Neon Transfection System, Thermo Fisher Scientific) containing 1  $\mu\text{g}$  TALEN or ZFN mRNAs. The cells were then electroporated with a single DC pulse (1,100 V, 30 ms, pulse number 1; program no. 6 for *PDX1*-, *KDR*-, and *SALL1*-KO, and 1,600 V, 20 ms, pulse number 1; program no. 4 for *HHEX*-KO), followed by culture at  $32^{\circ}\text{C}$  for 3 days, without antibiotics for the first 24 h and with antibiotics thereafter. Next, the cells were cultured at  $37^{\circ}\text{C}$  until they reached 90% confluence, after which limiting dilution was performed to obtain single-cell-derived clones in five 96-well plates. Twelve to 14 days later, colonies at high confluence (>70%) were selected and divided for subculture and mutation analyses.

### Analysis of Mutations in Nuclear Donor Cells and Fetuses

For mutation analysis, the target region of each genome-editing tool was amplified via direct PCR from cell clones using MightyAmp DNA polymerase version 2 (Takara Bio, Shiga, Japan) and then nested PCR was performed using appropriate primers (Table S2). The sequence of the amplicons containing the target region was determined using sequencing primers (Table S2) and the BigDye Terminator Cycle Sequencing Kit (Thermo Fisher Scientific), on an ABI PRISM 3130xl Genetic Analyzer (Thermo Fisher Scientific). For some cell clones, the nested PCR products were cloned and sequenced using a Zero Blunt TOPO PCR Cloning Kit for Sequencing (Thermo Fisher Scientific).

### Production of Gene-KO Pig Fetuses by Somatic Cell Nuclear Transfer

SCNT of gene-KO cells was performed as described previously (Kurome et al., 2008; Matsunari et al., 2013), with slight modifications. In brief, nuclear donor cells were used for SCNT following cell-cycle synchronization through serum starvation for 2 days. A single

donor cell was electrically fused with each enucleated cytoplasm prepared from *in-vitro*-matured oocytes. The reconstructed embryos were electrically activated and cultured in porcine zygote medium-5 (PZM-5), Research Institute for Functional Peptides, Yamagata, Japan) (Yoshioka et al., 2008) for 3 h in the presence of 5  $\mu\text{g}/\text{mL}$  cytochalasin B and 500 nM scriptaid (Zhao et al., 2009), and embryos were then cultured with 500 nM scriptaid for another 12–15 h. After these treatments, the cloned embryos were cultured in PZM-5 under a humidified atmosphere of 5%  $\text{CO}_2$ , 5%  $\text{O}_2$ , and 90%  $\text{N}_2$  at  $38.5^{\circ}\text{C}$ . After reaching the morula stage (day 4), the embryos were cultured in PZM-5 supplemented with 10% FBS. Cloned embryos at days 1–2 or days 5–6 were surgically transferred to the oviducts or uterine horns, respectively, of estrus-synchronized recipients. SCNT embryos at the morula stage were used to generate chimeric embryos.

### Production of Chimeric Pig Fetuses by Blastocyst Complementation

Lines of mutant fibroblast cells carrying the *PDX1*-KO, *PDX1/KDR*-KO, *SALL1*-KO, and *HHEX*-KO traits were employed for nuclear transfer to produce cloned host embryos. Cloned donor embryos were produced through nuclear transfer using female fibroblasts isolated from a pig carrying the huKO (Matsunari et al., 2008) or Plum (Watanabe et al., 2015) transgenes. In some experiments, the donor blastomeres carrying huKO transgene were prepared from *in-vivo*-derived or IVF-derived morulae that had been cryopreserved previously (Maehara et al., 2012). WT embryos were also used for complementing the *HHEX*-KO embryos.

Donor embryos at the morula stage (day 4) were de-compacted with 0.1 mM EDTA-2Na (in  $\text{Ca}^{2+}/\text{Mg}^{2+}$ -free PBS supplemented with 0.01% polyvinyl alcohol) for 20 min, followed by the removal of the zonae pellucidae via digestion with a 0.25% pronase solution (in PBS(–)). Blastomeres were isolated from the embryos by gentle pipetting using a finely drawn glass capillary. Host embryos at the morula stage were similarly de-compacted. Six to eight donor blastomeres were injected into the center of each host embryo through micromanipulation. The injected embryos were cultured *in vitro* for 24 or 48 h to obtain chimeric blastocysts. Developing blastocysts were surgically transferred to the uteri of estrus-synchronized recipients on day 5 or 6.

### Detection of Chimerism and Genotyping of Fetuses Using PCR

Genomic DNA was extracted from biopsy specimens from the fetuses employing a DNA extraction kit (DNeasy Blood & Tissue Kit, QIAGEN, Hilden, Germany). All chimeras were identified by the detection of host and donor embryo-derived sequences by PCR analysis using appropriate primers (Table S2) and DNA sequence analysis.

In brief, to identify *PDX1*-KO  $\leftrightarrow$  huKO (or Plum) chimeras, nested PCR was conducted to detect sequences derived from the host embryos (*PDX1*-KO) and donor embryos (huKO or Plum), respectively.

To identify *PDX1/KDR*-KO  $\leftrightarrow$  huKO chimeras, *KDR*-KO mutant sequences (host embryo derived), were amplified by PCR, cloned, and sequenced as described above, in addition to the detection of the *PDX1*-KO mutant and huKO transgene sequences (Table





S2). For some chimeric fetuses, allele-specific PCR using Hi-Di DNA polymerase (myPOLs Biotec, Konstanz, Germany) was performed using allele-specific primers, which allowed to amplify the *KDR*-KO allele (host embryo derived) efficiently.

To identify *SALL1*-KO ↔ huKO chimeras, nested PCR was performed to detect host embryo-derived (*SALL1*-KO) cells. To detect *huKO* transgene sequence (donor embryo-derived) and amelogenin (*AMEL X* and *AMEL Y* for sex determination) sequences, nested PCR was performed as described previously (Matsunari et al., 2018).

To identify *HHEX*-KO ↔ WT (or huKO) chimeras, DNA sequence analyses to detect both WT and *HHEX* sequences (donor embryo derived) and *HHEX*-KO mutant sequence (host embryo derived) were conducted. The target regions in the *HHEX* gene were amplified by PCR, cloned, and sequenced, as described above (Table S2). Nested PCR was conducted to detect *huKO* (donor embryo derived) and amelogenin sequences.

### Histological Analyses

Histological examination of mutated and complemented organogenesis was performed on tissue samples from the *PDX1*-KO, *PDX1/KDR*-KO, *SALL1*-KO, *HHEX*-KO, and chimeric fetuses. Control tissues were obtained from age-matched male normal (WT) fetuses. Tissue samples were fixed for 24 h in a neutrally buffered paraformaldehyde solution (4%) and embedded in paraffin blocks. The sections were stained with H&E or analyzed immunohistochemically using secondary antibodies conjugated with horseradish peroxidase (DAB stain) or fluorescent labels.

The primary antibodies used in this study were anti-insulin (no. LS-C24686, LifeSpan BioSciences, WA), anti-glucagon (no. G2654), and anti-VEGFR2 (no. 2479, Cell Signaling Technology, MA), anti-PECAM-1 (no. sc-1506, Santa Cruz Biotechnology, TX), anti-CD34 (no. 250591, Abbiotec, CA), anti-CD45 (no. 60287-1-Ig, Proteintech, IL), anti-SALL1 (no. PP-K9814-00, Perseus Proteomics, Tokyo, Japan), anti-albumin (no. A100-110A, Bethyl Laboratories, TX), and anti-huKO (no. PM051M, Medical & Biological Laboratories, Nagoya, Japan). The isotype-specific secondary antibodies were anti-guinea pig IgG coupled to Alexa Fluor 488 (no. ab150185, Abcam, Cambridge, UK) and anti-rabbit IgG coupled to Alexa Fluor 594 (no. A21207, Thermo Fisher Scientific). After antibody treatment, the sections were mounted with Vectashield mounting medium (Vector Laboratories, Burlingame, CA) containing DAPI for nuclear counterstaining and observed by fluorescence microscopy (BZ-X710; Keyence, Osaka, Japan).

### SUPPLEMENTAL INFORMATION

Supplemental Information can be found online at <https://doi.org/10.1016/j.stemcr.2019.11.008>.

### AUTHOR CONTRIBUTIONS

H. Nagashima designed the overall study. H. Nagashima, H. Matsunari, and M.W. wrote the manuscript with contributions from H. Nakauchi, R.N., H. Masaki, S.H., T.Y., and M.N. H. Matsunari, and H. Nagashima performed the experiments for somatic cell cloning with technical help from K.H., A.U., and K.N. M.W. and

K.U. generated gene knockout cells and performed genetic and biochemical analysis of samples.

### ACKNOWLEDGMENTS

We thank H. Kadoi for help with the maintenance of pigs and S. Fujimura, T. Ohmori, and S. Takayanagi for experimental/technical assistance. This work was supported by grants from the Japan Science and Technology Agency (ERATO, Nakauchi Stem Cell and Organ Regeneration Project), the Japan Agency for Medical Research and Development (LEAP, Generation of Functional Organs using developmental niche, JP19gm0010002), and Meiji University International Institute for Bio-Resource Research. H. Nagashima is a co-founder and shareholder of ChimaERA Corporation and PorMedTec Co., Ltd. H. Nakauchi is a co-founder and shareholder of iCELL Inc., ChimaERA Corporation, and ReproCELL Inc.

Received: June 19, 2019

Revised: November 26, 2019

Accepted: November 26, 2019

Published: December 26, 2019

### REFERENCES

- Barbera, J.P.M., Clements, M., Thomas, P., Rodriguez, T., Meloy, D., Kioussis, D., and Beddington, R.S.P. (2000). The homeobox gene *Hex* is required in definitive endodermal tissues for normal forebrain, liver and thyroid formation. *Development* 127, 2433–2445.
- Bort, R., Signore, M., Tremblay, K., Barbera, J.P.M., and Zaret, K.S. (2006). *Hex* homeobox gene controls the transition of the endoderm to a pseudostratified, cell emergent epithelium for liver bud development. *Dev. Biol.* 290, 44–56.
- Gao, X., Nowak-Imialek, M., Chen, X., Hermann, D., Ruan, D., Chen, D.C.H., Eckersley-Maslin, M.A., Ahmad, S., Lee, Y.L., Kobayashi, T., et al. (2019). Establishment of porcine and human expanded potential stem cells. *Nat. Cell Biol.* 21, 687–699.
- Goto, T., Hara, H., Sanbo, M., Masaki, H., Sato, H., Yamaguchi, T., Hoshi, S., Kobayashi, T., Nakauchi, H., and Hirabayashi, M. (2019). Generation of pluripotent stem cell-derived mouse kidneys in *Sall1*-targeted anephric rats. *Nat. Commun.* 10, 451.
- Gupta, R.M., and Musunuru, K. (2014). Expanding the genetic editing tool kit: ZFNs, TALENs, and CRISPR-Cas9. *J. Clin. Invest.* 124, 4154–4161.
- Habener, J.F., Kemp, D.M., and Thomas, M.K. (2005). Minireview: transcriptional regulation in pancreatic development. *Endocrinology* 146, 1025–1034.
- Hamanaka, S., Umino, A., Sato, H., Hayama, T., Yanagida, A., Mizuno, N., Kobayashi, T., Kasai, M., Suchy, F.P., Yamazaki, S., et al. (2018). Generation of vascular endothelial cells and hematopoietic cells by blastocyst complementation. *Stem Cell Reports* 11, 988–997.
- Jonsson, J., Carlsson, L., Edlund, T., and Edlund, H. (1994). Insulin-promoter-factor-1 is required for pancreas development in mice. *Nature* 371, 606–609.
- Jung, J.P., Bhuiyan, D.B., and Ogle, B.M. (2016). Solid organ fabrication: comparison of decellularization to 3D bioprinting. *Biomater. Res.* 20, 27.

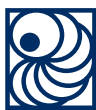

- Kang, J.D., Kim, H., Jin, L., Guo, Q., Cui, C.D., Li, W.X., Kim, S., Kim, J.S., and Yin, X.J. (2017). Apancreatic pigs cloned using Pdx1-disrupted fibroblasts created via TALEN-mediated mutagenesis. *Oncotarget* 8, 115480–115489.
- Keng, V.W., Yagi, H., Ikawa, M., Nagano, T., Myint, Z., Yamada, K., Tanaka, T., Sato, A., Muramatsu, I., Okabe, M., et al. (2000). Homeobox gene *Hex* is essential for onset of mouse embryonic liver development and differentiation of the monocyte lineage. *Biochem. Biophys. Res. Commun.* 279, 739.
- Kobayashi, T., Kato-Itoh, M., and Nakauchi, H. (2015). Targeted organ generation using Mixl1-inducible mouse pluripotent stem cells in blastocyst complementation. *Stem Cells Dev.* 24, 182–189.
- Kobayashi, T., Yamaguchi, T., Hamanaka, S., Kato-Itoh, M., Yamazaki, Y., Ibata, M., Sato, H., Lee, Y.S., Usui, J., Knisely, A.S., et al. (2010). Generation of rat pancreas in mouse by interspecific blastocyst injection of pluripotent stem cells. *Cell* 142, 787–799.
- Kohlhase, J., Schuh, R., Dowe, G., Kühnlein, R.P., Jäckle, H., Schroeder, B., Schulz-Schaeffer, W., Kretschmar, H.A., Köhler, A., Müller, U., et al. (1996). Isolation, characterization, and organ-specific expression of two novel human zinc finger genes related to the *Drosophila* gene spalt. *Genomics* 38, 291–298.
- Kurome, M., Ishikawa, T., Tomii, R., Ueno, S., Shimada, A., Yazawa, H., and Nagashima, H. (2008). Production of transgenic and non-transgenic clones in miniature pigs by somatic cell nuclear transfer. *J. Reprod. Dev.* 54, 156–163.
- Liu, Y., Yang, R., He, Z., and Gao, W.Q. (2013). Generation of functional organs from stem cells. *Cell Regen. (Lond.)* 2, 1.
- Lu, T.Y., Lin, B., Kim, J., Sullivan, M., Tobita, K., Salama, G., and Yang, L. (2013). Repopulation of decellularized mouse heart with human induced pluripotent stem cell-derived cardiovascular progenitor cells. *Nat. Commun.* 4, 2307.
- Maehara, M., Matsunari, H., Honda, K., Nakano, K., Takeuchi, Y., Kanai, T., Matsuda, T., Matsumura, Y., Hagiwara, Y., Sasayama, N., et al. (2012). Hollow fiber vitrification provides a novel method for cryopreserving in vitro maturation/fertilization-derived porcine embryos. *Biol. Reprod.* 87, 133.
- Matsunari, H., Nagashima, H., Watanabe, M., Umeyama, K., Nakano, K., Nagaya, M., Kobayashi, T., Yamaguchi, T., Sumazaki, R., Herzenberg, L.A., et al. (2013). Blastocyst complementation generates exogenic pancreas in vivo in apancreatic cloned pigs. *Proc. Natl. Acad. Sci. U S A* 110, 4557–4562.
- Matsunari, H., Onodera, M., Tada, N., Mochizuki, H., Karasawa, S., Haruyama, E., Nakayama, N., Saito, H., Ueno, S., Kurome, M., et al. (2008). Transgenic-cloned pigs systemically expressing red fluorescent protein, Kusabira-Orange. *Cloning Stem Cells* 10, 313–323.
- Matsunari, H., Watanabe, M., Nakano, K., Enosawa, S., Umeyama, K., Uchikura, A., Yashima, S., Fukuda, T., Klymiuk, N., Kurome, M., et al. (2018). Modeling lethal X-linked genetic disorders in pigs with ensured fertility. *Proc. Natl. Acad. Sci. U S A* 115, 708–713.
- Nagashima, H., and Matsunari, H. (2016). Growing human organs in pigs—a dream or reality? *Theriogenology* 86, 422–426.
- Nishinakamura, R., Matsumoto, Y., Nakao, K., Nakamura, K., Sato, A., Copeland, N.G., Gilbert, D.J., Jenkins, N.A., Scully, S., Lacey, D.L., et al. (2001). Murine homolog of SALL1 is essential for ureteric bud invasion in kidney development. *Development* 128, 3105–3115.
- Noden, D.M., and de Lahunta, A. (1985). *The Embryology of Domestic Animals: Developmental Mechanisms and Malformations* (Williams & Wilkins).
- Offield, M.F., Jetton, T.L., Labosky, P.A., Ray, M., Stein, R.W., Magnuson, M.A., Hogan, B.L., and Wright, C.V. (1996). PDX-1 is required for pancreatic outgrowth and differentiation of the rostral duodenum. *Development* 122, 983–995.
- Rashid, T., Kobayashi, T., and Nakauchi, H. (2014). Revisiting the flight of Icarus: making human organs from PSCs with large animal chimeras. *Cell Stem Cell* 15, 406–409.
- Sakurai, Y., Ohgimoto, K., Kataoka, Y., Yoshida, N., and Shibuya, M. (2005). Essential role of Flk-1 (VEGF receptor 2) tyrosine residue 1173 in vasculogenesis in mice. *Proc. Natl. Acad. Sci. U S A* 102, 1076–1081.
- Shalaby, F., Rossant, J., Yamaguchi, T.P., Gertsenstein, M., Wu, X.F., Breitman, M.L., and Schuh, A.C. (1995). Failure of blood-island formation and vasculogenesis in Flk-1-deficient mice. *Nature* 376, 62–66.
- Taguchi, A., Kaku, Y., Ohmori, T., Sharmin, S., Ogawa, M., Sasaki, H., and Nishinakamura, R. (2014). Redefining the in vivo origin of metanephric nephron progenitors enables generation of complex kidney structures from pluripotent stem cells. *Cell Stem Cell* 14, 53–67.
- Takasato, M., Er, P.X., Chiu, H.S., Maier, B., Baillie, G.J., Ferguson, C., Parton, R.G., Wolvetang, E.J., Roost, M.S., Chuva de Sousa Lopes, S.M., et al. (2015). Kidney organoids from human iPSC cells contain multiple lineages and model human nephrogenesis. *Nature* 526, 564–568.
- Takasato, M., and Little, M.H. (2016). A strategy for generating kidney organoids: recapitulating the development in human pluripotent stem cells. *Dev. Biol.* 420, 210–220.
- Takebe, T., Enomura, M., Yoshizawa, E., Kimura, M., Koike, H., Ueno, Y., Matsuzaki, T., Yamazaki, T., Toyohara, T., Osafune, K., et al. (2015). Vascularized and complex organ buds from diverse tissues via mesenchymal cell-driven condensation. *Cell Stem Cell* 16, 556–565.
- Takebe, T., Sekine, K., Enomura, M., Koike, H., Kimura, M., Ogaeri, T., Zhang, R.R., Ueno, Y., Zheng, Y.W., Koike, N., et al. (2013). Vascularized and functional human liver from an iPSC-derived organ bud transplant. *Nature* 499, 481–484.
- Tan, W.S., Carlson, D.E., Walton, M.W., Fahrenkrug, S.C., and Hackett, P.B. (2012). Precision editing of large animal genomes. *Adv. Genet.* 80, 37–97.
- Usui, J.I., Kobayashi, T., Yamaguchi, T., Knisely, A.S., Nishinakamura, R., and Nakauchi, H. (2012). Generation of kidney from pluripotent stem cells via blastocyst complementation. *Am. J. Pathol.* 180, 2417–2426.
- Vilarino, M., Rashid, S.T., Suchy, F.P., McNabb, B.R., van der Meulen, T., Fine, E.J., Ahsan, S., Mursaliyev, N., Sebastiano, V., Diab, S.S., et al. (2017). CRISPR/Cas9 microinjection in oocytes disables pancreas development in sheep. *Sci. Rep.* 7, 17472.
- Watanabe, M., Kobayashi, M., Nagaya, M., Matsunari, H., Nakano, K., Maehara, M., Hayashida, G., Takayanagi, S., Sakai, R.,



Umeyama, K., et al. (2015). Production of transgenic cloned pigs expressing the far-red fluorescent protein monomeric Plum. *J. Reprod. Dev.* *61*, 169–177.

Watanabe, M., Nakano, K., Uchikura, A., Matsunari, H., Yashima, S., Umeyama, K., Takayanagi, S., Sakuma, T., Yamamoto, T., Morita, S., et al. (2019). Anephrogenic phenotype induced by SALL1 gene knockout in pigs. *Sci. Rep.* *9*, 8016.

Wu, J., Greely, H.T., Jaenisch, R., Nakauchi, H., Rossant, J., and Belmonte, J.C. (2016). Stem cells and interspecies chimaeras. *Nature* *540*, 51–59.

Yamaguchi, T., Sato, H., Kato-Itoh, M., Goto, T., Hara, H., Sanbo, M., Mizuno, N., Kobayashi, T., Yanagida, A., Umino, A., et al. (2017). Interspecies organogenesis generates autologous functional islets. *Nature* *542*, 191–196.

Yamanaka, S., Tajiri, S., Fujimoto, T., Matsumoto, K., Fukunaga, S., Kim, B.S., Okano, H.J., and Yokoo, T. (2017). Generation of interspecies limited chimeric nephrons using a conditional nephron progenitor cell replacement system. *Nat. Commun.* *8*, 1719.

Yamanaka, S., and Yokoo, T. (2015). Current bioengineering methods for whole kidney regeneration. *Stem Cells Int.* *2015*, 724047.

Yoshioka, K., Suzuki, C., and Onishi, A. (2008). Defined system for in vitro production of porcine embryos using a single basic medium. *J. Reprod. Dev.* *54*, 208–213.

Zhao, J.G., Ross, J.W., Hao, Y.H., Spate, L.D., Walters, E.M., Samuel, M.S., Rieke, A., Murphy, C.N., and Prather, R.S. (2009). Significant improvement in cloning efficiency of an inbred miniature pig by histone deacetylase inhibitor treatment after somatic cell nuclear transfer. *Biol. Reprod.* *81*, 525–530.



**Stem Cell Reports, Volume 14**

**Supplemental Information**

**Compensation of Disabled Organogeneses in Genetically Modified Pig  
Fetuses by Blastocyst Complementation**

**Hitomi Matsunari, Masahito Watanabe, Koki Hasegawa, Ayuko Uchikura, Kazuaki Nakano, Kazuhiro Umeyama, Hideki Masaki, Sanae Hamanaka, Tomoyuki Yamaguchi, Masaki Nagaya, Ryuichi Nishinakamura, Hiromitsu Nakauchi, and Hiroshi Nagashima**

## Supplemental Information

### Compensation of Disabled Organogeneses in Genetically Modified Pig Fetuses by Blastocyst Complementation

Hitomi Matsunari, Masahito Watanabe, Koki Hasegawa, Ayuko Uchikura, Kazuaki Nakano, Kazuhiro Umeyama, Hideki Masaki, Sanae Hamanaka, Tomoyuki Yamaguchi, Masaki Nagaya, Ryuichi Nishinakamura, Hiromitsu Nakauchi, Hiroshi Nagashima

#### Inventory of supplemental information:

Figure S1. Mutation of the *PDX1* gene in cloned pig produced by somatic cell cloning, Related to Figure 1.

Figure S2. Mutation of the *KDR* gene in cloned pig produced by somatic cell cloning, Related to Figure 2 and 3.

Figure S3. Mutation of the *SALL1* gene in pig cloned by somatic cell nuclear transfer, Related to Figure 4.

Figure S4. Morphological and histological features of the *SALL1*-KO cloned fetuses and its compensation by blastocyst complementation, Related to Figure 4.

Figure S5. Mutation of the *HHEX* gene in cloned pig produced by somatic cell cloning, Related to Figure 5.

Table S1. Production performance of chimeric individuals by blastocyst complementation for the organogenesis-disabled traits in pigs, Related to Figure 1-5.

Table S2. Primer sequences for mutation analysis and detection of chimeras, Related to Figure 1-5.

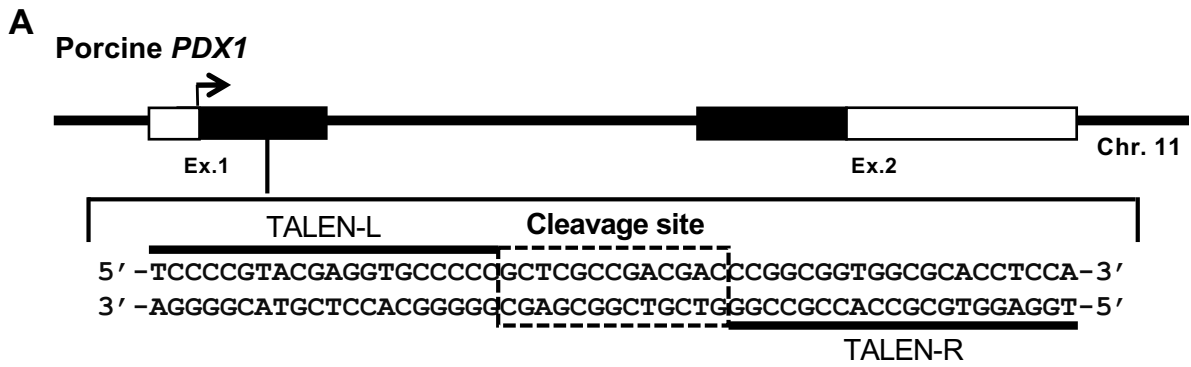

**B**

**Wild-type** TCCCCGTACGAGGTGCCCCCGCTCGCCGACGACCCGGCGGTGGCGCACCTCCA

**Clone #45**  
 (61 bp del) TCCCCGTACGAGGTGCCCCCGCTCGCCGACGAC\*\*\*\*\*  
 \*\*\*\*\*CCGGGCCCTTCC  
 CGGATGGAGCCGAGCCAGGAGCCCTGGAGGAGCCCGGCCGCTCCAGCCGCCT

ggagtcaacgtcctgcagctgacagactccagcgaggtcccgg\*\*\*\*\*  
 \*\*\*\*\*

(1,224 bp del + 6 bp del) \*\*\*\*\* (1224 bp del) \*\*\*\*\*  
 \*\*\*\*\*  
 \*\*\*\*\*CGCACCTCCA  
 CCACCACCTCCCGGCTCAGCTGGCACTCCCGC\*\*\*\*\*CCGGGCCCTTCC  
 CGGATGGAGCCGAGCCAGGAGCCCTGGAGGAGCCCGGCCGCTCCAGCCGCCT

**Clone #114**  
 (4 bp del) TCCCCGTACGAGGTGCCCCCGC\*\*\*CGACGACCCGGCGGTGGCGCACCTCCA

TCCCCGTACGAGGTGCCCCCGCTCGCCGATGGTTAACGAATCCGACTAGGAAC  
**CATGAGGTTGCAGGTTTCGATCCCTGGCCTTGCTCCGTGGGTAAAGGATCTGGC**  
 (195 bp ins) **GTTGCCGTGAGCTGTGGTGTAGGTTGCAGATGCAGCTCAGATCCCACGTTGCT**  
**CGGTGTAGGCAGGTGGCTACAGCTCCCATTAGACCCCTAGCTGGAAACCTCC**  
**ATATGCCCCCGACGACCCGGCGGTGGCGCACCTCCA**

**C**

**Development of the cloned embryos with *PDX1*-KO trait**

| Recipient No. | Cloned embryos transferred: |                           |                            | Fetuses obtained: |             |              |
|---------------|-----------------------------|---------------------------|----------------------------|-------------------|-------------|--------------|
|               | Total                       | #45-derived <sup>1)</sup> | #114-derived <sup>1)</sup> | Total             | #45-derived | #114-derived |
| M70           | 101                         | 51                        | 50                         | 4 (4.0%)          | 3           | 1            |

1) Nuclear donor cell with 61 bp / 1,230 bp deletion mutations (#45) and 4 bp deletion / 195 bp insertion (#114) were used to generate the cloned embryos.

**Figure S1. Mutation of the *PDX1* gene in cloned pig produced by somatic cell cloning**  
 A: Cleavage site of *PDX1* gene in the nuclear donor cells used for producing cloned pigs. Recognition sites of *PDX1*-targeted TALENs are indicated by lines. B: The uppercase sequences represent the coding region of porcine *PDX1* gene. The deletion and insertion mutations are indicated by asterisks and bold letters, respectively. The *PDX1* allele of cell clone #45 with 1224 bp deletion has another 6 bp deletion at the outer side of TALEN binding sites. C: Production efficiency of the *PDX1*-KO cloned fetuses.



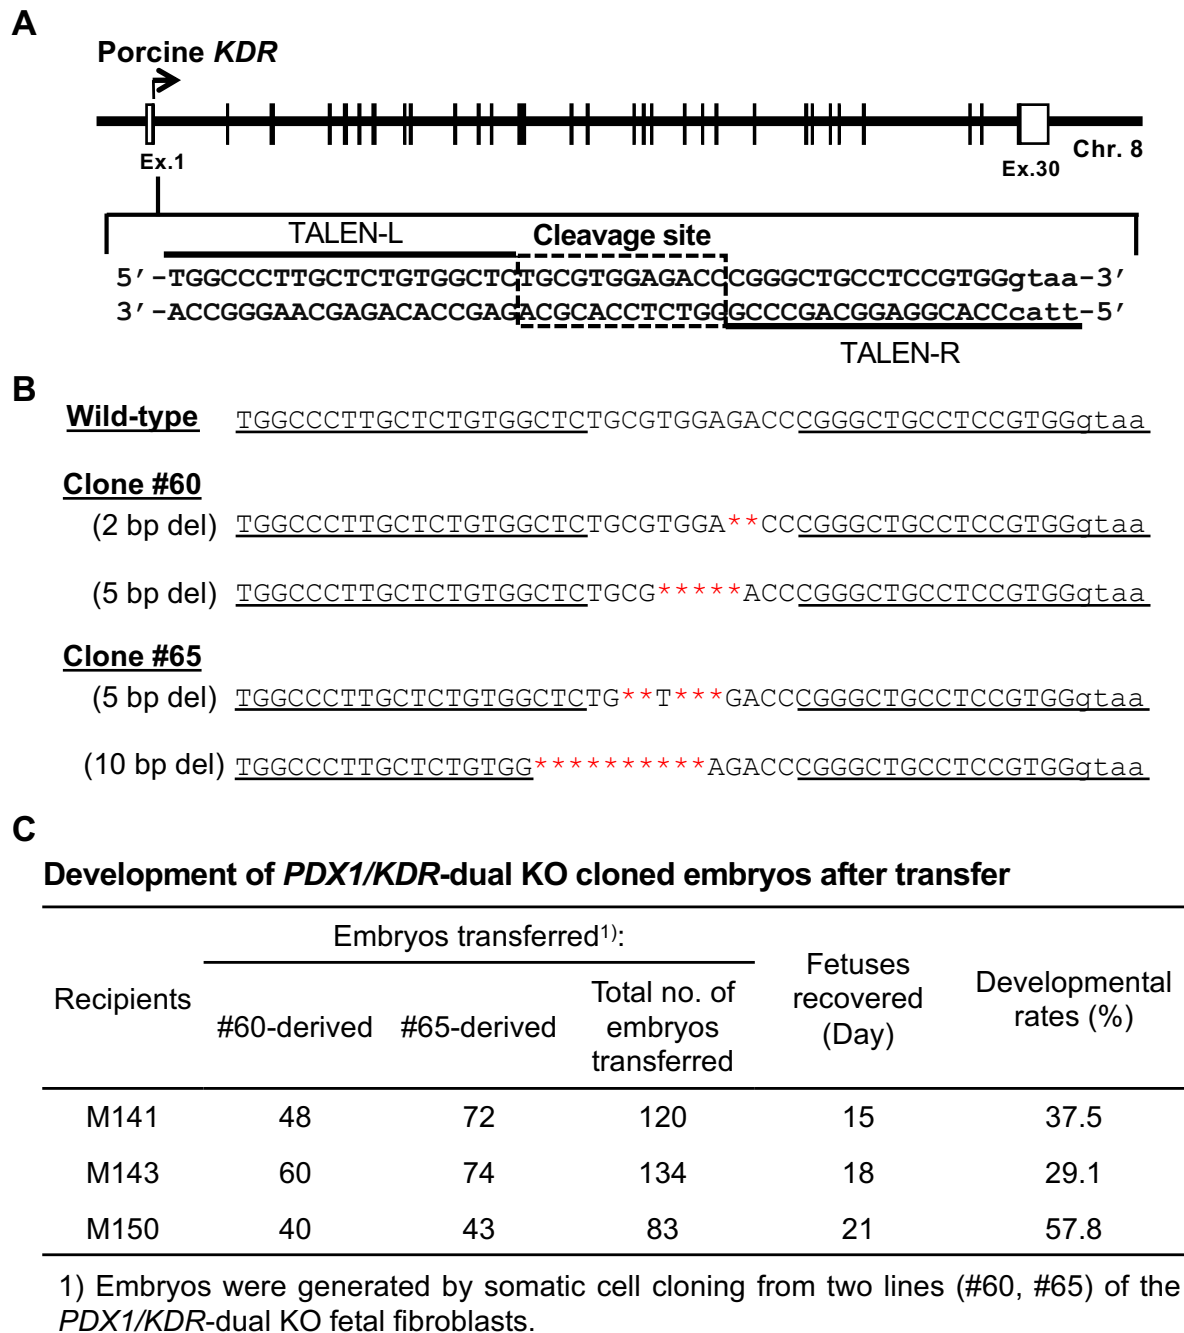

**Figure S2. Mutation of the *KDR* gene in cloned pig produced by somatic cell cloning**

A: Cleavage site of *KDR* gene in the nuclear donor cells for producing cloned pigs. Recognition sites of *KDR*-targeted TALENs are indicated by lines. B: The uppercase sequences represent the coding region of porcine *KDR* gene. The deletion mutations are indicated by asterisks. C: Production efficiency of *PDX1/KDR*-dual KO cloned fetuses.

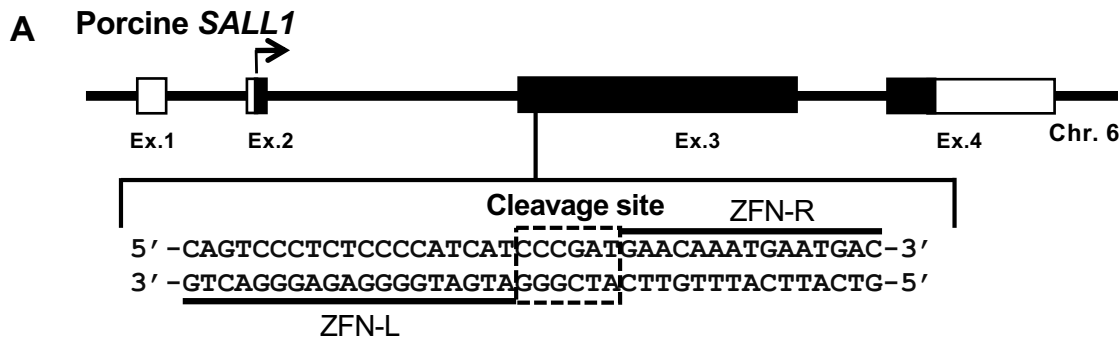

**B Wild-type** CAGTCCCTCTCCCCATCATCCCGATGAACAAATGAATGAC

**Clone #81**  
 (4 bp del) CAGTCCCTCTCCCCATCATC\*\*\*\*TGAACAAATGAATGAC

(521 bp del) CAGTCCCTCTCC\*\*\*\*\*  
 \*\*\*\*\*  
 \*\*\*\*\* (521 bp del) \*\*\*\*\*  
 \*\*\*\*\*  
 \*\*\*\*\*ACTTGCCAGCATCTTCTAGTCCTTCTCAAGG

**Clone #91**  
 (5 bp del + 183 bp del) CAGTCCCTCTCCCC**AAAT**\*\*\*\*\*TGAACAAAT**TTTCAAT**  
**TTGT**\*\*\*\*\*  
 \*\*\*\*\* (183 bp del) \*\*\*\*\*  
 \*\*\*\*\*  
 \*\*\*\*\*GCAGCAGCAGCTCCTGCACAGGTACCTCAGCGATCA

**C. Development of the cloned embryos with SALL1-KO trait**

| Recipient No. | Cloned embryos transferred: |                           |                           | Anephrogenic fetuses obtained: |             |             |                          |
|---------------|-----------------------------|---------------------------|---------------------------|--------------------------------|-------------|-------------|--------------------------|
|               | Total                       | #81-derived <sup>1)</sup> | #91-derived <sup>2)</sup> | Total                          | #81-derived | #91-derived | Age                      |
| M35           | 109                         | 0                         | 109                       | 1 (0.9%) <sup>3)</sup>         | 0           | 1           | day-66                   |
| M36           | 108                         | 0                         | 108                       | 0                              | 0           | 0           | miscarried <sup>4)</sup> |
| M47           | 161                         | 81                        | 80                        | 3 (1.9%) <sup>5)</sup>         | 3           | 0           | day-43                   |
| P29           | 161                         | 81                        | 80                        | 1 (0.6%) <sup>5)</sup>         | 1           | 0           | day-45                   |

- 1) Nuclear donor cells with 4 bp / 521 bp deletion mutations (#81) were used to generate the cloned embryos.
- 2) Nuclear donor cells with homozygotic 188 bp deletion mutation (#91) were used to generate the cloned embryos.
- 3) Degenerating fetus
- 4) day-44 of gestation
- 5) Another five (M47) and two (P29) fetuses were obtained, but nephrogenesis in these fetuses could not be analyzed due to severe retardation of the development.

**Figure S3. Mutation of the SALL1 gene in pig cloned by somatic cell nuclear transfer**

A: Cleavage site of the SALL1 gene in the nuclear donor cells for producing cloned pigs. Recognition sites of SALL1-targeted ZFNs are indicated by lines. B: The uppercase sequences represent the coding region of porcine SALL1 gene. The deletion mutations are indicated by asterisks. The 13 bp (2 bp + 11 bp) substitution mutations occurred in clone #91 are indicated in bold letters. C: Production efficiency of the SALL1-KO cloned fetuses.

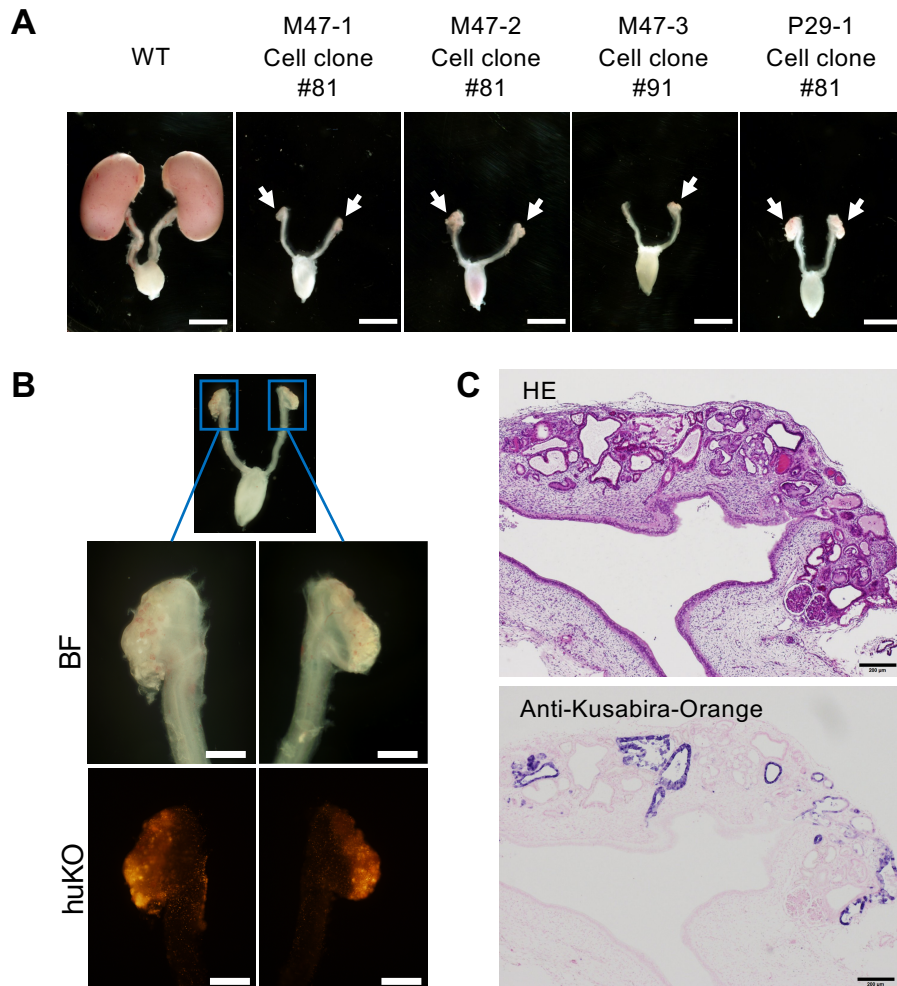

**Figure S4. Morphological and histological features of the *SALL1*-KO cloned fetuses and its compensation by blastocyst complementation**

A: Typical features of the aneprogenic phenotype in the *SALL1*<sup>-/-</sup> fetuses. Note that features of the vestigial kidney with the same mutation (#81) vary among the fetuses. Scale bars, 5 mm. B: A case of incomplete compensation of the *SALL1*<sup>-/-</sup> aneprogenic trait after blastocyst complementation with exogenous cells expressing huKO. Note that distribution of huKO expressing cells are limited in both ureter and hypoplastic kidney tissue, indicating insufficient level of chimerism of this fetus. Scale bars, 1 mm. C: An HE section of a hypoplastic kidney (upper) and immunostained section showing limited distribution of the huKO positive cells. Scale bars, 200  $\mu$ m.

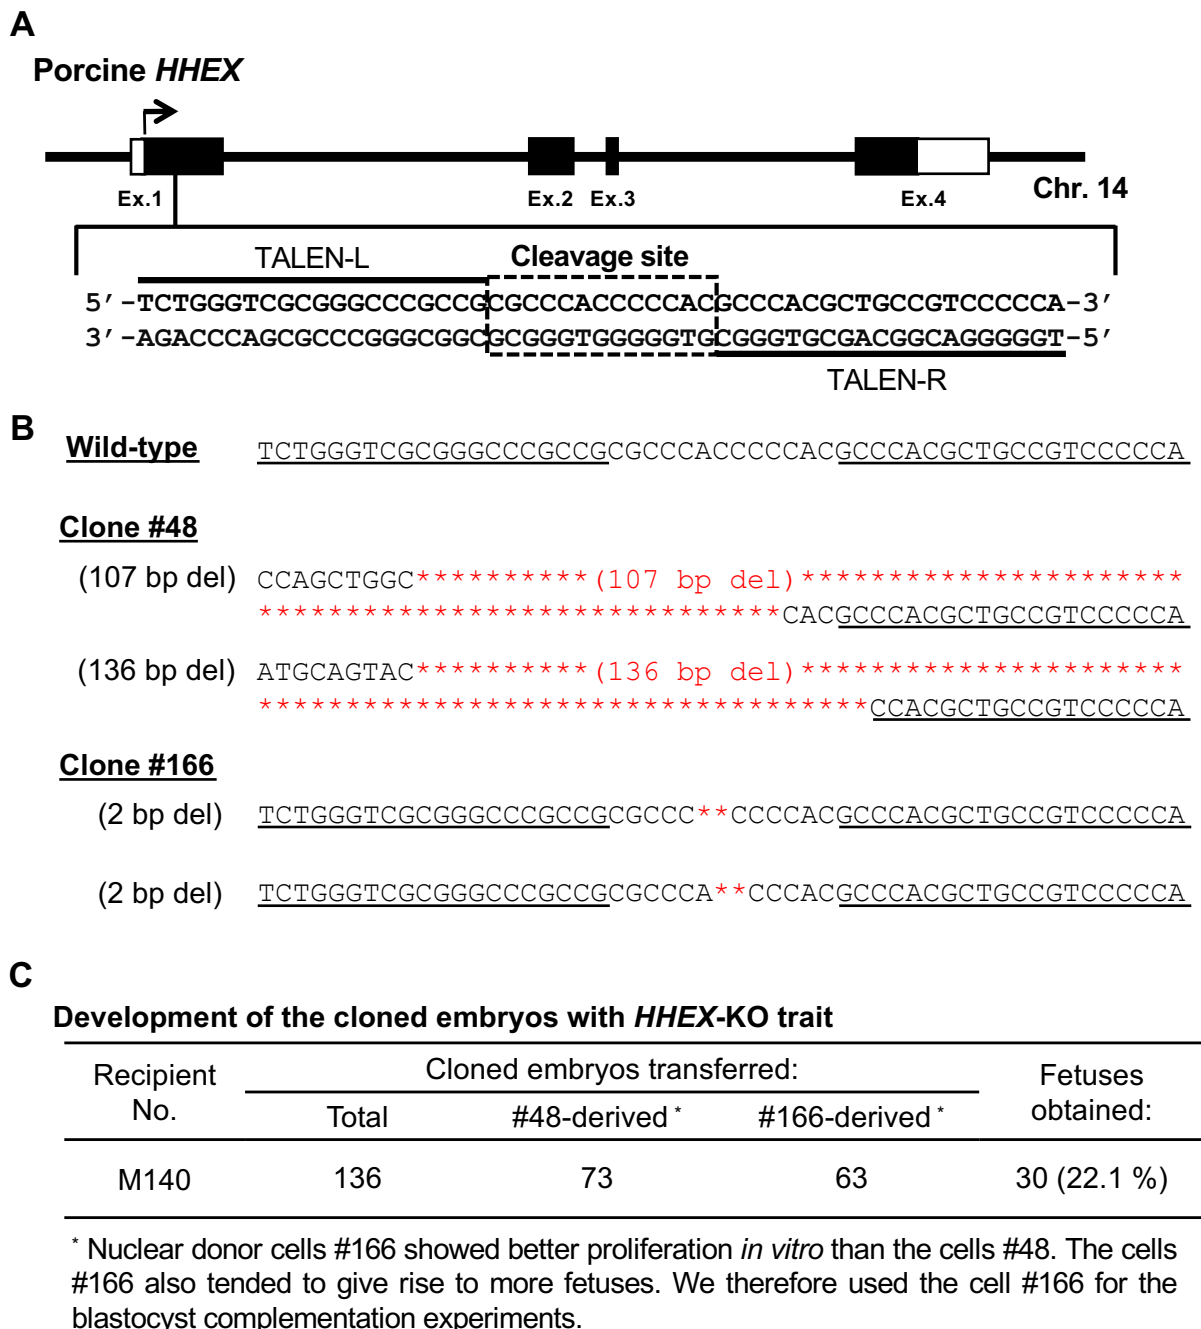

**Figure S5. Mutation of the *HHEX* gene in cloned pig produced by somatic cell cloning**  
 A: Cleavage site of the *HHEX* gene in the nuclear donor cells for producing cloned pigs. Recognition sites of *HHEX*-targeted TALENs are indicated by lines. B: The uppercase sequences represent the coding region of porcine *HHEX* gene. The deletion mutations are indicated by asterisks. Both lines of the mutant cells (#48, #166) were used as nuclear donors for somatic cell cloning. C: Production efficiency of *HHEX*-KO cloned fetuses. The *HHEX*<sup>-/-</sup> fetuses exhibited a hepatogenic phenotype with varying degree of anterior abnormalities. No significant phenotypic difference was seen in the mutant fetuses derived from the two cell lines.



**Table S1. Production performance of chimeric individuals by blastocyst complementation for the organogenesis-disabled traits in pigs**

| Type of host embryos                  | Recipient pigs | Embryos transferred | Type of fetuses obtained (%) |                         |                        | Age of fetuses examined (day) |
|---------------------------------------|----------------|---------------------|------------------------------|-------------------------|------------------------|-------------------------------|
|                                       |                |                     | Chimera                      | Host embryo-derived     | Donor embryo-derived   |                               |
| <i>PDX1</i> -KO <sup>1</sup>          | M101           | 66                  | 0 (0)                        | 0 (0)                   | 0 (0) <sup>3</sup>     | — <sup>4</sup>                |
|                                       | M102           | 65                  | 3 (4.6) <sup>5</sup>         | 4 (6.2)                 | 0 (0) <sup>3</sup>     | 107                           |
|                                       | M109           | 97 <sup>2</sup>     | 1 (1.0)                      | 2 (2.2)                 | 0 (0) <sup>3</sup>     | 114                           |
|                                       | M110           | 97 <sup>2</sup>     | 0 (0)                        | 1 (1.0)                 | 0 (0) <sup>3</sup>     | 114                           |
| <i>PDX1/KDR</i> -dual KO <sup>6</sup> | M203           | 38                  | 9 (33.3) <sup>7</sup>        | 13 (48.1)               | 5 (18.5) <sup>8</sup>  | 21                            |
| <i>SALL1</i> -KO <sup>9,10</sup>      | M82            | 82                  | 1 (1.2) <sup>11</sup>        | 0 (0) <sup>9,10</sup>   | 1 (1.2)                | 44                            |
|                                       | M84            | 81                  | 0 (0)                        | 1 (1.2) <sup>9,10</sup> | 0 (0)                  | 47                            |
|                                       | M105           | 64                  | 0 (0)                        | 0 (0) <sup>10</sup>     | 0 (0)                  | — <sup>4</sup>                |
|                                       | M120           | 64                  | 1 (1.6) <sup>11</sup>        | 1 (1.6) <sup>10</sup>   | 2 (3.1)                | 40                            |
|                                       | M223           | 48                  | 0 (0)                        | 3 (6.3) <sup>10</sup>   | 2 (4.2) <sup>13</sup>  | 41                            |
|                                       | M224           | 49                  | 1 (2.0) <sup>12</sup>        | 5 (10.2) <sup>10</sup>  | 1 (2.0) <sup>13</sup>  | 43                            |
| <i>HHEX</i> -KO <sup>14</sup>         | M207           | 37                  | 4 (26.7) <sup>15</sup>       | 9 (60.0)                | 2 (13.3) <sup>16</sup> | 23                            |
|                                       | 1703           | 50                  | 2 (33.3) <sup>15</sup>       | 0 (0)                   | 4 (66.7) <sup>16</sup> | 102                           |
|                                       | 1717           | 45                  | 1 (100) <sup>15</sup>        | 0 (0)                   | 0 (0) <sup>16</sup>    | 101                           |

<sup>1</sup> Host embryos were prepared by somatic cell cloning from two lines (#45, #114; Fig. S1) of *PDX1*-KO fetal fibroblasts.

<sup>2</sup> Nuclear donor cells #45 were used to prepare the host embryos.

<sup>3</sup> Morula blastomeres collected from the cloned embryos expressing huKO or Plum were used for complementation of the host *PDX1*-KO embryos.

<sup>4</sup> The recipient was not impregnated.

<sup>5</sup> Two #45-derived and one #114-derived.

<sup>6</sup> Host embryos were prepared by somatic cell cloning of *PDX1/KDR*-dual KO fetal fibroblasts (#65; Fig. S2).

<sup>7</sup> Chimerism was determined by analysis of genomic DNA of the fetal tissue samples. Samples indicating both the sequence of the mutation site and huKO signal were determined as chimeric.

<sup>8</sup> Morula blastomeres collected from the *in-vivo*-derived embryos expressing huKO were used for complementation of the host *PDX1/KDR*-KO embryos.

<sup>9</sup> Nuclear donor cells with 4 bp / 521 bp deletion mutations (#81, Fig. S3) were used to generate the cloned host embryos.

<sup>10</sup> Nuclear donor cells with homozygous 188 bp deletion mutation (#91, Fig. S3) were used to generate the cloned host embryos.

<sup>11</sup> Retained the anephrogenic phenotype. Limited contribution of the exogenous huKO expressing cells were observed in the hypoplastic kidney tissue.

<sup>12</sup> Restored kidneys were developed from exogenous huKO expressing cells.

<sup>13</sup> Fetuses derived from the donor embryos. *In-vivo*-derived or *in vitro* fertilization (IVF) derived embryos expressing huKO transgene were used as donor embryos.

<sup>14</sup> Host embryos were prepared by somatic cell cloning of *HHEX*-KO fetal fibroblasts (#166; Fig. S5).

<sup>15</sup> Chimerism was determined by analysis of genomic DNA of the fetal tissue samples. Samples indicating both the mutant and WT sequences of the *HHEX*-KO site were determined as chimeric.

<sup>16</sup> Morula blastomeres collected from the *in-vivo*-derived embryos expressing huKO were used for complementation of the host *HHEX*-KO embryos.

**Table S2. Primer sequences for mutation analysis and detection of chimeras**

| Mutation analysis     |                              |                             |                          |
|-----------------------|------------------------------|-----------------------------|--------------------------|
| Target gene           | 1st PCR primers              | Nested PCR primers          | Sequencing primer        |
| <i>PDX1</i>           | 5'-ACTGCCAACTGCACATGCAG      | 5'-TGCGGAGCTGTCAAAGCAGCAGG  | 5'-CACGCAGCTCTACAAGGACC  |
|                       | 5'-AGCATCCCAGAGCCCTACTCG     | 5'-TGCTTTAGTCCGACTCTGC      |                          |
| <i>KDR</i>            | 5'-CAGTGTTCCTCAGCATCTCG      | 5'-TCAGAACCCCTGATGGACTAC    | 5'-TCGGACACTTGGGATAACTTC |
|                       | 5'-TCAGGAGACCACCAACTCGC      | 5'-ATCTTGGGCCAGGCATTGAGC    |                          |
| <i>HHEX</i>           | 5'-AGGCAGCTGCTTGCCTCACG      | 5'-GACTTCTTTCGAGGGCGTCAC    | 5'-TCCCGAGGGCGGGGAGCTCAG |
|                       | 5'-CGACGCCTGCAAGGTGCAGG      | 5'-AGTCACAGTGCGGTCACTCTG    |                          |
| <i>SALL1</i>          | 5'-ATTAGGCACCAATGTCGGCAG     | 5'-TGATAGGAAGTCCTCCAACAG    | 5'-TCGAAGTCACAGGTGGCTCC  |
|                       | 5'-TGCAGAGCTAAGAGCTGCTCC     | 5'-TCTCGATGATGACGTTGCTG     |                          |
| Detection of chimeras |                              |                             |                          |
| Target gene           | 1st PCR primers              | Nested PCR primers          |                          |
| <i>PDX1</i>           | 5'-TCTGCAGAGACGTCCTGATTC     | 5'-TCAATCCGTACACAGACGACG    |                          |
|                       | 5'-AGTGCAGGTGTGACGAGAAGTG    | 5'-AGTGAATTAGCATCGCAGACG    |                          |
| <i>KDR*</i>           | 5'-CTTGCTCTGTGGCTCTGT        | 5'-TGCTCTGTGGCTCTGTGA       |                          |
|                       | 5'-ATCTTGGGCCAGGCATTGAGC     | 5'-CTATGATTCCGAGTTAGGTCC    |                          |
| <i>SALL1</i>          | 5'-ATTAGGCACCAATGTCGGCAG     | 5'-TGATAGGAAGTCCTCCAACAG    |                          |
|                       | 5'-TGCAGAGCTAAGAGCTGCTCC     | 5'-TCTCGATGATGACGTTGCTG     |                          |
| <i>huKO</i>           | 5'-TGACCCTGAGGGTGACAATG      | 5'-ACGTGACCATGTTCTGAAGCTGG  |                          |
|                       | 5'-TCTGTTCTAACCTTGATCTGAAC   | 5'-AGCTAGCTTGCCAAACCTACAGG  |                          |
| <i>Plum</i>           | 5'-CTACAAGACCGACATCAAGCTG    | 5'-ACGAGGACTACACCATCGTGG    |                          |
|                       | 5'-ACAGCTATGACTGGGAGTAGTCAGG | 5'-TGTTTCATGGCAGCCAGCATATGG |                          |

\* Primers specific to *KDR*-KO mutant allele in clone 65 (5 bp deletion) were used.
